1 **Title:** Trait divergence and trade-offs among Brassicaceae species differing in  
2 elevational distribution

3 **Authors:** Alessio Maccagni<sup>1,2</sup>, Yvonne Willi<sup>1</sup>  
4

5 **Affiliation:** <sup>1</sup> Plant Ecology and Evolution, Department of Environmental Sciences,  
6 University of Basel, Schönbeinstrasse 6, 4056 Basel, Switzerland

7 <sup>2</sup> Botanical Garden of the Canton Ticino, Brissago Islands, P.O. 245, 6614  
8 Brissago, Switzerland

9

10 **Corresponding author:** Alessio Maccagni,  
11 phone: +41 79 715 26 66  
12 e-mail: a.maccagni@protonmail.ch  
13

14 **Title**

15 Trait divergence and trade-offs among Brassicaceae species differing in elevational distribution

16

17 **Abstract**

18 Species have restricted geographic distributions and the causes are still largely unknown.

19 Temperature has long been associated with distribution limits, suggesting that there are ubiquitous

20 constraints to the evolution of the climate niche. Here we investigated the traits involved in such

21 constraints by macroevolutionary comparisons involving around 100 Brassicaceae species differing

22 in elevational distribution. Plants were grown under three temperature treatments (regular frost,

23 mild, regular heat) and phenotyped for phenological, morphological and thermal resistance traits.

24 Trait values were analysed by assessing the effect of temperature and elevational distribution, by

25 comparing models of evolutionary trajectories, and by correlative approaches to identify trade-offs.

26 Analyses pointed to size, leaf morphology and growth under heat as among the most discriminating

27 traits between low- and high-elevation species, with high-elevation species growing faster under the

28 occurrence of regular heat bouts, at the cost of much reduced size. Mixed models and evolutionary

29 models supported adaptive divergence for these traits, and correlation analysis indicated their

30 involvement in moderate trade-offs. Finally, we found asymmetry in trait evolution, with

31 evolvability across traits being 50% less constrained under regular frost. Overall, results suggest

32 that trade-offs between traits under adaptive divergence contribute to the disparate distribution of

33 species along the elevational gradient.

34

35 **Key words**

36 heat and frost stress, macroevolution, Ornstein-Uhlenbeck, phylogenetic signal, range limits,

37 thermal niche

38

39

## 40 INTRODUCTION

41 Species have restricted geographic distributions, but the causes behind this phenomenon are still  
42 unsolved (MacArthur 1972; Gaston 2003; Connallon and Sgrò 2018; Willi and Van Buskirk 2019).  
43 From an ecological point of view, range limits reflect dispersal limitation or limits of the ecological  
44 niche, with the niche being defined as the abiotic and biotic conditions that allow a species to persist  
45 (i.e., the realized niche *sensu* Hutchinson 1957; Leibold 1995). From an evolutionary point of view,  
46 range limits reflect limits to the evolution of the ecological niche. But why is it that species fail to  
47 adapt to environmental conditions beyond their current range? MacArthur (1972) suggested that a  
48 possible reason is exclusive divergent adaptation across habitats. He envisioned that specialization  
49 to one environment imposes high demographic costs under colonization of a new environment, or in  
50 other words, a trade-off. Trade-offs are a key concept in evolution, likely affecting all aspects of  
51 ecological specialization (Rosenzweig 1995) and including species distribution limits, but they have  
52 been rarely studied in this context.

53       Among the many ecological factors that may affect the persistence of organisms, climate is  
54 known to be critical in controlling large-scale distribution (MacArthur 1972). Many past studies  
55 noticed coincidences between geographic or elevational range limits and temperature isotherms  
56 (Salisbury 1926; Iversen 1944; Dahl 1951; Root 1988). More recently, the field of species  
57 distribution modelling confirmed the good agreement between range limits and climate variables  
58 (e.g., Normand et al. 2009; Lee & Yaw et al. 2016). Further studies looked into phenotypic patterns  
59 associated with the most limiting aspects of climate at range limits, particularly at the cold end of  
60 distribution. Loehle (1998) suggested that the northern range limit of North American tree species  
61 was determined by cold tolerance. Phenotypic data supported that species from higher latitudes  
62 were usually more tolerant to the cold than those from lower latitudes (Addo-Bediako et al. 2000;  
63 Hawkins et al. 2014; Wen et al. 2018; Sunday et al. 2019). Similarly, abiotic stress appeared to be  
64 linked with the upper elevational range limit for some mountainous plant species, suggesting a  
65 predominant role of negative temperatures (Vetaas 2002; Macek et al. 2009; Körner et al. 2016).

66 Also, the warm end of distribution may be strongly affected by climate even though the prevailing  
67 hypothesis has emphasized the importance of negative species interactions (MacArthur, 1972;  
68 Gaston 2003; Louthan et al. 2015). So far, no clear evidence exists that e.g., competition explains  
69 the southern range limit of species on a global scale. Some studies supported the hypothesis (Loehle  
70 1998; Pither 2003), while others did not (Cahill et al. 2014). Probably because of the general  
71 dismissal of climate as a factor determining warm-end limits, few studies focused on how  
72 organisms cope with heat in the context of species distribution limits (e.g., Sunday et al. 2012;  
73 Kellermann et al. 2012;), particularly in plants (e.g., Kappen 1981; Vos and Willi 2015).

74         What are the sources of constraints in the evolution of the climate niche? According to  
75 simple evolutionary principles, genetic variation and selection are needed for a response to selection  
76 and adaptation (Falconer and Mackay 1996). Genetic constraints may involve low genetic variation  
77 of traits under selection. However, microevolutionary studies have shown that there is commonly  
78 ample genetic variation in single traits, and natural selection acting on populations is often strong  
79 (Mousseau & Roff 1987, Houle 1992, Kingsolver & Diamond 2011). These findings suggest  
80 generally rapid and ubiquitous adaptation through highly evolvable traits. Another type of genetic  
81 constraint is trade-offs in fitness-relevant traits, often seen as an obstacle to adaptive evolution by  
82 limiting the rate of adaptation (Futuyama and Moreno 1988; Bennett and Lenski 2007; Walker  
83 2007). Negative genetic correlations among traits in regard to their fitness consequences appear  
84 mainly due to two non-exclusive causes. The first is that both the environment and the genetics of  
85 traits exert a limitation on trait values through differential allocation of limited amounts of resources  
86 (Bell 1984; van Noordwijk and de Jong 1986). The second cause is purely genetic; pleiotropic  
87 antagonism occurs when an allele increases the fitness via a first trait but reduces it via a second  
88 (Rose 1983). If we translate this into a thermobiology context, it is reasonable to assert that thermal  
89 extremes impose selection on some traits, resulting in a better thermal performance under one type  
90 of extreme, paid at the price of a reduction in performance in a contrasting environment or a  
91 contrasting aspect of the biology of the species. In ectothermic animals, relatively common trade-

92 offs involve thermal resistance on the one hand, and growth, starvation resistance, longevity or  
93 reproduction on the other hand (Luckinbill 1998; Norry and Loeschcke 2002; Hoffmann et al. 2005;  
94 Stoks and De Block 2011; Casanueva et al. 2012), or cold and heat tolerance (Norry et al. 2007).  
95 Temperature can also mediate trade-offs between traits, e.g., between lifespan and reproduction  
96 (Mockett and Sohal 2006), or longevity and body size (Norry and Loeschcke 2002), or it can  
97 reverse the sign of a correlation (reviewed in Sgrò and Hoffmann 2004). In plants, trade-offs were  
98 discovered between cold tolerance and frost resistance (e.g., *Raphanus raphanistrum*; Agrawal *et*  
99 *al.* 2004), and between speed of development and frost tolerance (Koehler et al. 2012; Molina-  
100 Montenegro et al. 2012; Bucher et al. 2019).

101         While micro-evolutionary studies can shed-light on trade-offs, those involving traits related  
102 to the climate niche have not revealed any cohesive patterns (e.g., Williams et al. 2012; Kelly et al.  
103 2013). However, in the last decades, the field of comparative phylogenetics has developed macro-  
104 evolutionary models that allow the study of adaptive evolution of more than one trait while  
105 accounting for the shared history among species (summarized in Garamszegi 2014). Based on  
106 comparative models, the phylogenetic signal of traits can be estimated and interpreted in the context  
107 of niche conservatism (Cooper et al. 2010). Furthermore, the contribution of different evolutionary  
108 processes and constraints to respond to selection can be inferred (Butler and King 2004). Three  
109 evolutionary processes are typically modelled. A first is *genetic drift*, by which inherited characters  
110 slowly change in random direction and accumulate differences over time. The process is typically  
111 modelled by Brownian motion (BM). A second process is *stabilizing selection*, a likely result of  
112 dependencies among characters under opposing selection (Wagner and Schwenk 2000). It is  
113 modelled by Ornstein-Uhlenbeck (OU1) diffusion, which constrains BM toward an optimal trait  
114 value. Recent improvements allow variation in the direction of OU diffusion across lineages,  
115 depicting the third process of *divergent selection* (OUM, Beaulieu et al. 2012). This approach has  
116 been used in evolutionary studies linking traits with the climate niche, particularly on plants, and  
117 they highlighted a link between life-form or growth strategy, and adaptation (or exposure) to a cold

118 environment (Boucher et al. 2012; Kostikova et al. 2013; Tonnabel et al. 2018). Examples  
119 emphasize the great potential the approach has in detecting traits of adaptation to climate and  
120 revealing potential trade-offs in such adaptation or indicating general evolutionary constraints.

121 Here we studied trait divergence associated with the predominant elevational distribution of  
122 plant species and analysed trait data for patterns of trade-offs in a macroevolutionary context. The  
123 study of elevational gradients is promising in the context for at least two reasons. On the one hand,  
124 elevation provides a steep climatic gradient in most mountainous regions, where over a short  
125 geographic distance a reduction of the mean temperature of 0.5 K every 100 m of elevation is found  
126 rather consistently (Körner 2003). On the other hand, species often occupy narrow elevational  
127 ranges (Körner 2003), making elevational gradients unique systems for studying adaptation to  
128 thermal stress and constraints in such evolution. Our study involved 100 Brassicaceae species  
129 occurring in the central Alps of Europe, with median elevational occurrence varying from 400 to  
130 2800 m a.s.l. Seeds of the species were raised in climate chambers under three different temperature  
131 regimes (regular frost, mild, regular heat), and over a dozen traits depicting growth, leaf  
132 morphology and coping with thermal extremes were measured. Four main hypotheses were tested.  
133 (i) Species differ in trait expression depending on their elevational distribution. (ii) Traits differ in  
134 the signature of past evolutionary processes having acted on them. (iii) Phylogenetic conservatism  
135 in traits depends on the growth (thermal) environment. And (iv) there are trade-offs among traits  
136 associated with adaptation to elevation.

137

## 138 **MATERIAL AND METHODS**

### 139 **Plant species**

140 One hundred taxa (i.e., species and subspecies) belonging to the Brassicaceae family and naturally  
141 occurring in the Swiss Alps (and Jura) from the colline to the alpine life zone were selected. Apart  
142 from a good representation of the elevational gradient, other criteria were level of ploidy (diploid  
143 taxa preferred) and good representation of the phylogeny (list in Supplementary material A1). In the

144 general area, around 180 species of Brassicaceae occur, of which 28 are strictly high-elevation  
145 species. On a global scale, Brassicaceae is an angiosperm family composed of 3'700 species  
146 (including important agricultural cultivars) subdivided into three main lineages (Al-Shehbaz et al.  
147 2006).

148 For this study, seeds were collected from March to September during the years 2015-2017 at  
149 two different sites for each species within Switzerland. The sites were around the most common  
150 elevation for each species, at least 50 km apart from each other and preferentially from different  
151 biogeographic regions (Jura, Plateau, northern Prealps, western and eastern Central Alps and  
152 southern Prealps). For plants with very restricted distributions, only one population was sampled,  
153 but the number of individuals was doubled. At each site, seeds were collected from 10 to 30  
154 different mother plants over an area of usually 50 m<sup>2</sup> and spaced out from each other by 5 m. For  
155 endangered species on the Red List 2002 for Switzerland (Moser et al. 2002), authorization for  
156 sampling was obtained from the respective Cantonal authority. Sampled seeds of each mother plant  
157 were stored in separate paper bags (80 g m<sup>-2</sup>, 60 × 90 / 12 mm, ELCO AG, Brugg, Switzerland)  
158 under cold (4 °C), dark and dry (added silica gel) conditions until sowing.

159

### 160 **Raising of plants under three growth treatments and trait assessment**

161 *Design* - The experimental design involved the raising of 100 taxa, each represented by 2  
162 populations and 3 maternal lines per population, i.e. 6 maternal lines per species. The experiment  
163 was split into 6 blocks, with a different maternal line per species in a block. Within block, plants of  
164 a maternal line were exposed to 3 temperature treatments (regular frost, mild, regular heat). The  
165 final design resulted in 1'800 individuals (100 taxa × 6 maternal lines each in a different block × 3  
166 treatments = 1'800 individuals). Maternal lines of a population were selected randomly, and seeds  
167 of a maternal line were selected haphazardly. A first round of sowing (S1) was done without the use  
168 of gibberellic acid (GA<sub>3</sub>), resulting in some species (20) not germinating and some heterogeneity in  
169 the timing of germination. In a second round of sowing (S2), seeds were treated with gibberellic acid

170 (GA<sub>3</sub>), resulting in the germination of 14 additional species (but 5 were now lacking that  
171 germinated in S1) and a more similar timing of germination.

172 *Plant rearing* - Seeds were germinated in climate chambers under controlled conditions,  
173 with similar procedures in S1 and in S2 (S2 described in detail below). Two seeds were placed in a  
174 1.5 ml eppendorf tube filled with 500 µl of GA<sub>3</sub> solution (500 ppm, Merck KGeA, Dornstadt,  
175 Germany), with 3 tubes per maternal line. Seeds were incubated for 1 week in dark and cold (4 °C  
176 constant in Climecabs; Kälte 3000, Landquart, Switzerland) and then sown in multipot-trays (0.06  
177 L, 54 pots per tray with Ø 4.4 cm each, BK Qualipot; gvz-rossat.ch, Otelfingen, Switzerland). Each  
178 pot had been filled with a mixture of soil (bark compost, peat and perlite, Aussaat- und Pikiererde;  
179 Oekohum, Herrenhof, Switzerland) and sand (0-4mm) in a ratio of 2:1. Multi-pot trays were  
180 covered with a garden fleece (Windhager, Hünenberg, Switzerland) and set up in blocks within  
181 growth chambers (MobyLux GroBanks; CLF Plant Climatics, Wertingen, Germany). Growth  
182 chambers were located inside a PlantMaster (CLF Plant Climatics) with managed humidity and  
183 temperature. Trays were kept at 18 °C during daytime (8 h) and 15 °C during nighttime (16 h), at  
184 75% relative humidity (RH), and a light intensity of 150 µmol m<sup>-2</sup> s<sup>-1</sup> (fluorescent white lamps and  
185 red-LED). Twice a week, blocks were moved to a different chamber, with re-randomized  
186 positioning of trays. After 3 weeks, excess seedlings were used to fill pots with no germination with  
187 the following priority: use of the same maternal line within block, or the same population, or the  
188 same species. In week 4, germinated plants were moved back to climate chambers and entire trays  
189 were subjected to one of three temperature treatments.

190 *Treatment* - The three temperature treatments were: "frost" (F), "mild/control" (M) and  
191 "heat" (H). Conditions of the treatments were the following: frost: 20 °C (daytime), then -2 °C for 1  
192 h (-4.8 K h<sup>-1</sup>; nighttime) and back to 20 °C (+7.3 K h<sup>-1</sup>; night); mild/control: 20 °C constant; and  
193 heat: 20 °C (beginning of day), then 40 °C for 1 h (+5 K h<sup>-1</sup>; day), back to 20 °C (-8.3 K h<sup>-1</sup>; day),  
194 20 °C (night). All treatments were conducted at cycles of 12:12 h light:dark and a light intensity of  
195 about 300 µmol m<sup>-2</sup> s<sup>-1</sup> (LED white lamp) and 75% RH. Plants were acclimated two days before the



196 beginning of treatment by exposing them to milder extremes, 2 °C for the frost treatment, and 35 °C  
197 for the heat treatment. We selected extreme temperatures based on records in the field during the  
198 vegetative period (Larcher and Wagner 1976; Sutinen et al. 2001; Körner 2003), while for the mild  
199 treatment we used a common standard temperature. Trays were randomized daily within each  
200 block, while blocks were moved to different climate chambers twice a week. Plants were kept  
201 under these conditions until the 9<sup>th</sup> week after sowing, when trait assessments were performed.  
202 Mean species numbers across blocks that were assessed for a particular trait within the treatments  
203 ranged from  $82.1 \pm 3.6$  (heat) to  $85.5 \pm 3.5$  (mild) in S2 (N = 1406 plants), and from  $52.1 \pm 24.0$   
204 (heat) to  $74.6 \pm 1.1$  (mild) in S1 (N = 862 plants).

205 *Traits* - Two traits were assessed before treatment started: seed size (SSIZ, in mm<sup>2</sup>) and days  
206 to germination (TGER). Five traits depicted the trajectory of plant growth based on leaf length: the  
207 initial growth rate (IGR, in mm day<sup>-1</sup>), parameters of a 3-parameter logistic model including the  
208 maximal growth rate (MGR, scale<sup>-1</sup>), the mid-point until final size was reached (XMID, in days)  
209 and asymptotic size (ASYM, in mm), and finally the number of plants on day 35 of treatment  
210 (NLEA). Since smaller values of XMID meant that a plant achieved mid-size faster, values were  
211 multiplied by -1 ([-]XMID) to represent speed of growth. Five leaf functional traits were assessed:  
212 leaf area (LA, in mm<sup>2</sup>), specific leaf area (SLA, area over dry weight in mm<sup>2</sup> mg<sup>-1</sup>), leaf dry matter  
213 content (LDMC, ratio of dry weight over fresh weight in mg g<sup>-1</sup>), leaf dissection index (LDI, no  
214 unit), and leaf thickness (LTh, in mm). Resistance of leaves to thermal extremes was assessed under  
215 -10 °C (*minus*T2) and -5 °C (*minus*T1), and +45 °C (*plus*T1) and +50 °C (*plus*T2). Resistance to T1  
216 was tested only on non-acclimated plants (i.e., plants of the mild growth treatment), while T2 was  
217 tested on non-acclimated and acclimated plants (i.e., plants pre-exposed to frost for assessing frost  
218 resistance, and plants pre-exposed to heat for assessing heat resistance). Tolerance to repeated frost  
219 or heat during the growth phase was calculated as MGR, -XMID or ASYM under frost or heat  
220 treatment minus the respective estimate in the mild treatment, divided by the estimate in the mild  
221 treatment. We used the term frost/heat tolerance *sensu lato* (*s.l.*) to refer to tolerance and resistance

222 together. Full details are given in Supplementary material A2. For analyses, means of replicate trait  
223 measures per plant were calculated, on which species means per treatment and sowing round and  
224 finally species means per treatment across sowing rounds were calculated.

225

## 226 **Statistical analysis**

227 *Trait expression differing with temperature treatment during growth and elevational distribution -*

228 The effect of temperature treatment, median elevation of species distribution, and their interaction  
229 on traits was tested using generalised linear mixed models based on Markov Chain Monte Carlo  
230 techniques with the ‘brm’ function of the R package {brms} (Bürkner 2017). The fixed effect of  
231 treatment was coded as a categorical variable, and contrasts were performed against the “mild”  
232 treatment or, for tolerance, against “frost”. The fixed effect of median elevation of species  
233 distribution was calculated based on reported species occurrences of a nation-wide species  
234 inventory (infoflora.ch). Median elevation was mean-centred prior to analyses. Random effects  
235 were the round of sowing (i.e., S1 and S2) and the relatedness among species. A phylogeny  
236 produced based on several dozen chloroplast genes (Patsiou et al. 2021) was pruned to species  
237 included in this study with the function ‘treedata’ of package {geiger} (Harmon et al. 2008). The  
238 final matrix was obtained with the function ‘vcv’ {ape} (Paradis and Schliep 2018) and called with  
239 the ‘cov\_ranef’ argument in brm. For each model, the contribution of the phylogenetic effect was  
240 tested by comparing the model that included it as a random effect to one that did not. Model  
241 comparisons were performed using the leave-one-out cross validation (i.e., LOO), which was  
242 calculated with the ‘add\_criterion’ {brms} function combined with the expected log pointwise  
243 predictive density (i.e., ELPD) with the ‘loo\_compare’ {brms} function. Resistance traits were  
244 modelled by a beta distribution because of their constrained nature between 0 and 1 (i.e., 100%), -  
245 XMID and tolerances by a gaussian distribution, and the remaining traits by a log-normal  
246 distribution because values could only be positive. Sampling behaviour of MCMC was inspected  
247 visually, and number of iterations, warmup and sampling interval adapted to each model to retain an

248 effective sampling size of 1'000. Significance was tested by probability of direction calculated with  
249 the 'p\_direction' function in {bayestestR} (Makowski et al. 2019). All analyses and figures were  
250 done with the statistics software R v. 4.0.3 (R Core Team 2014), and calculations were performed at  
251 sciCORE (<http://scicore.unibas.ch/>) scientific computing center of the University of Basel.

252 *Past evolutionary forces* - Further analyses were performed on species trait means averaged  
253 across rounds of sowing. Phylogenetic analyses on the evolutionary processes that had shaped trait  
254 divergence among species were run separately for the three temperature treatments, and by  
255 considering variance in trait means of species of the two rounds of sowing. We tested five  
256 evolutionary models using the R package {geiger} and {mvMORPH} (Clavel et al. 2015): White  
257 noise (WN) with trait evolution independent of phylogeny, BM, BMM with different speeds of the  
258 different regimes, OU1 and OUM. For BMM and OUM, the contrasting environmental regimes  
259 were low- vs. high-elevation distribution of species. Assignment to one of the two classes was made  
260 using the InfoFlora ([infoflora.ch](http://infoflora.ch)) distribution information, with a threshold at 1500 m a.s.l.  
261 (splitting species of the foothills/hills from those of sub-/alpine areas). For less frequent species on  
262 Swiss territory, the assignment was verified by data on the entire Alps and neighbouring mountain  
263 massifs (based on Aeschimann et al 2004). Ancestral state reconstruction and model comparison are  
264 described in Supplementary material A2. Validation of the results was performed by simulations on  
265 synthetic data and analyses after the random removal of species (A2).

266 Phylogenetic half-life, i.e. the time required for a trait to evolve halfway toward its adaptive  
267 optimum, was calculated for all traits assessed in the three growth environments and in each  
268 simulation described above. Values were extracted from an OU1 model, except when elevation had  
269 a significant effect – either in mixed models or evolutionary analysis; in those cases, values were  
270 derived from an OUM process. Small values of half-life indicate fast adaptation toward the optima  
271 and a lack of phylogenetic inertia, while high values indicate that traits retain the influence of the  
272 ancestral states for a longer time. We tested for an effect of growth environment (a factor with 3  
273 levels, with 'mild' as baseline) on the evolutionary lability of traits with a generalised linear mixed

274 model with ‘brm’ (as specified above). Phylogenetic half-life was modelled assuming a lognormal  
275 distribution (only positive values), and trait was a random effect.

276 *Multi-trait relationships and trade-offs* - To identify putative trade-offs between pairs of  
277 traits, Pearson correlation coefficients were calculated using the ‘rcorr’ function of the package  
278 {Hmisc} (Harrell 2019). Before performing correlations, some traits were log<sub>10</sub>-transformed (i.e.,  
279 SSIZ, MGR, NLEA, LA, LDI and RESpT2), and all traits were centred to a mean of zero and  
280 scaled to the variance. Then, highly collinear traits were removed from the dataset using the  
281 ‘vifstep’ function {usdm} with threshold of 10, which resulted in the drop of 10 traits (i.e.,  
282 ASYM<sub>Frost</sub>, ASYM<sub>Heat</sub>, NLEA<sub>Mild</sub>, NLEA<sub>Heat</sub>, LA<sub>Frost</sub>, LA<sub>Heat</sub>, SLA<sub>Frost</sub>, LDI<sub>Mild</sub>, LDI<sub>Heat</sub> and  
283 TOL\_IGR<sub>Frost</sub>; correlation matrix in Supplementary material A5). To further reduce the number of  
284 traits while maintaining the most discriminating ones depending on the elevation of origin of  
285 species, discriminant analysis of principal components (DAPC) was performed with ‘dapc’ of the  
286 package {adegenet} (Jombart 2008). The optimal number of PCs to retain was selected based on  
287 stratified cross-validation with ‘xvalDapc’ function of the package {adegenet} and 10’000  
288 simulations for each level of PC retention. Traits contributing with a loading higher than 0.024 (i.e.,  
289 the third quartile of the variables contribution) were selected and used for correlation analysis.

290

## 291 **RESULTS**

### 292 **Trait expression differing with temperature treatment during growth and with elevational** 293 **distribution**

294 Results on trait expression differing between growth treatments and species depending on their  
295 elevational distribution are summarized in Table 1, Fig. 1 and Supplementary material A3. A high  
296 fraction of traits (~70%) responded to temperature. Under regular frost compared to mild  
297 conditions, plants reached the midpoint of growth earlier (A3 Fig. 1E), but they had smaller  
298 asymptotic size (Fig. 1B) and fewer and smaller leaves (A3 Fig. 1G, H). Their leaves had less  
299 surface area per dry mass and were thicker (smaller SLA and LTh; Fig. 1C and A3 Fig. 1I, K).

300 However, frost resistance of leaves was not significantly different after pre-exposure to frost during  
301 growth (A3 Fig. 1R). Under regular heat during growth compared to mild conditions, the maximal  
302 growth rate of plants was significantly higher (Fig. 1A), the time to maximal growth shorter (A3  
303 Fig. 1E) and plants had smaller asymptotic size (Fig. 1B, A3 Fig. 1F) and smaller leaves (Fig. A3  
304 Fig. 1H). Furthermore, leaves had more surface area per dry mass and less dry mass per wet weight  
305 (larger SLA, smaller LDMC; A3 Fig. 1I, J and Fig. 1C). Finally, tolerance to heat was generally  
306 higher compared to tolerance to frost for maximal growth rate and asymptotic size (Fig. 1E, G).

307 Median elevation of species distribution alone explained only significant variation in the  
308 general expression of three traits (Tab. 1). Species occurring at higher elevation had smaller leaves  
309 (A3 Fig. 1H), lower dry-matter content (Fig. 1C) and lower heat resistance under no acclimation  
310 (RES(+)<sub>T2</sub>; Fig. 1D). A considerable fraction of traits was significantly affected by an interaction  
311 between median elevation of distribution and treatment, but only in the comparison between mild  
312 conditions and the heat treatment. The only notable exception was that higher-elevation species had  
313 increased frost resistance (after acclimation), but only for the first round of sowing (A3 Fig. 1R).  
314 When exposed to heat, higher- compared to lower-elevation species had faster growth (Fig. 1A),  
315 reached maximal growth earlier (higher -XMID, Fig. A3 Fig. 1E), but ended up being smaller (Fig.  
316 1B), with smaller and less dissected leaves (A3 Fig. 1H, L). In line, higher-elevation species  
317 showed heightened tolerance to heat – compared to frost – by having a faster maximum growth  
318 (Fig. 1E), which was reached earlier (Fig. 1F), but they also showed lower tolerance to heat by  
319 ending up being smaller (Fig. 1G). Comparisons between models with and without considering the  
320 phylogeny revealed that its inclusion improved the model for about 70% of traits (Tab. 1, A3).

321

## 322 **Past evolutionary forces**

323 Table 2 summarizes results on analyses of evolutionary processes having acted on traits, for each  
324 growth environment (for a full account see Supplementary material A4). The comparison between  
325 the two evolutionary switch models (i.e., ‘ER’, under which low and high elevation are predicted to

326 change at equal rate; or ‘ARD’, under which for- and backward rates between states can take  
327 different values) indicated a slightly better performance of the more parameterised model ( $AIC_{ER}$   
328 106.898;  $AIC_{ARD}$  103.111), with a fitted value of  $Q$  from low  $\rightarrow$  high of .030 and low  $\leftarrow$  high of  
329 .910.

330 Several of the traits found to differ between low- and high-elevation species in mixed-model  
331 analyses were confirmed to support a scenario of adaptive evolution with two optima. These traits  
332 included: maximal growth rate, asymptotic size, leaf dry matter content, heat resistance and  
333 tolerances in growth parameters (Tab. 2, A4). The optimum for high-elevation species was at a  
334 lower MGR under control conditions, at a smaller asymptotic size under all growth conditions and  
335 at a lower LDMC under regular frost. Furthermore, high-elevation species had an optimum at lower  
336 heat resistance when raised under mild conditions, but at higher heat resistance when raised under  
337 regular heat. Finally, high-elevation species had optima at higher tolerance values to heat based on  
338 MGR and -XMID; they had been selected to accelerate the speed of growth more under heat stress.  
339 But they had optima for tolerance to frost and heat based on asymptotic size that were lower. These  
340 results appear to be robust, as they did not deviate significantly from the results obtained from  
341 bootstrap simulations (A4).

342 Simulations performed on the phylogeny but with synthetic data (A4 Fig. 2) revealed that  
343 adaptive divergence between low- and high-elevation species was identified correctly when trait  
344 variance was low ( $<100$ ) and the difference between optima (thetas) large. False positives for the  
345 adaptive model were rare, while false negatives in favour of OU or WN were frequent. Simulations  
346 that randomly removed a third of the species generally resulted in increased support for OUM (A4).  
347 Specifically, to the traits already mentioned above, high- compared to low-elevation species also  
348 differed in having optima at slower initial growth under control conditions, but at higher maximum  
349 growth rate under stress (in frost and heat treatments). Furthermore, optima differed for leaf size  
350 under frost (i.e., at smaller leaf size for high-elevation species) and leaf dry matter content under  
351 heat (i.e., at lower LDMC for high-elevation species). No further differences were found for traits

352 related to resistance, while tolerance to regular frost based on maximal growth rate had separate  
353 optima, with the one of high-elevation species being at lower tolerance to frost.

354 Measures of phylogenetic half-life (i.e.,  $\ln(2) \alpha^{-1}$ ; Tab. 3, A4) were rarely  
355 significantly larger than 0 (25-38% depending on treatment, Tab. 3), The most constrained traits  
356 were associated with size and morphology, e.g., ASYM with a half-life of 10-16 Mya,  $LA_{Heat}$  with  
357 25 Mya, LTh with 7-10 Mya and  $LDI_{Frost}$  with 15 Mya. Mixed-effects analysis with bootstrap  
358 simulations revealed that the evolution of trait values under regular frost was less constrained  
359 compared to mild conditions or regular heat (i.e., Frost vs Mild: -.605 [-.616, -.593]; Heat vs Mild:  
360 .192 [.180, .204]), resulting in a reduction of average half-life of about 50% (A4 Fig. 3A, B).

361

### 362 **Multi-trait relationships and trade-offs**

363 A principal component analysis on trait values of all trait-growth treatment combinations revealed  
364 their correlation structure. The first PC axis explained 15.7% of the total variance and depicted the  
365 relationship between timing of plant growth, especially in the heat treatment, and plant size under  
366 mild conditions. The second PC (10.5%) was primarily influenced by LTh, and to a lesser extent by  
367 basal resistance and tolerance components, depicting a distinction between these two strategies  
368 (Supplementary material A5). The optimal number of principal components to retain (i.e., lowest  
369 MSE and highest mean success) based on cross-validation was 35 (accounting for 99% of trait  
370 variation, A5).

371 With these PCs, taxa could be assigned to their elevation of origin, either low or high, with  
372 an accuracy of 98% and 94.4% respectively (A5). In multivariate space, the trait with the greatest  
373 weight was leaf area under mild conditions, while the other traits that contributed most to  
374 differentiating low- and high-elevation species were associated to leaf morphology under mild and  
375 warm conditions (i.e., LTh, LDMC, SLA), speed of growth under heat (i.e., TOL\_IGR, TOL\_-  
376 XMID) and tolerance under frost (i.e., LDI, TOL\_ASYM, A5). Pearson correlations were  
377 significantly negative between specific leaf area under heat and leaf area ( $LA_{Mild}$ , Fig 2A) or leaf

378 dry matter content ( $LDMC_{Mild}$ , Fig. 2C;  $LDMC_{Heat}$ , Fig. 2E), with the latter correlation being likely  
379 driven by non-independence of calculating estimates. Furthermore, leaf area under mild conditions  
380 was negatively correlated with heat tolerance based on the mid-point of growth ( $TOL_{-XMID}$ , Fig.  
381 2B), suggesting a trade-off between maintaining large size and speeding up growth under heat.  
382 Tolerance under warm based on midpoint of growth was also negatively associated with leaf  
383 dissection index under frost (Fig. 2F), which in turn was negatively associated with leaf thickness  
384 under mild conditions (Fig. 2D). However, these two correlations did not involve traits linked to  
385 elevational distribution.

386

## 387 **DISCUSSION**

388 Past studies in ecology and biogeography have indicated that temperature is a limiting factor of  
389 species distribution, suggesting that there are ubiquitous constraints to the evolution of the climate  
390 niche. To improve our understanding of such constraints, we studied approximately 100 species  
391 differing in elevational distribution and presumably with different climate niches. More specifically,  
392 we investigated which traits differed with elevational distribution, whether those traits had been  
393 under divergent selection over the elevational gradient, and potential sources of constraints in their  
394 adaptive divergence. The species were found to systematically differ in few traits. Most  
395 importantly, higher-elevation plants were found to have smaller and less robust leaves. Further  
396 differences emerged when growing conditions included regular heat bouts. Then higher-elevation  
397 species accelerated growth more, at the cost of a considerable reduction in size. The same or similar  
398 traits were found to be under divergent selection over the elevational gradient, and some were  
399 involved in moderate trade-offs, notably the ability to speed up growth under heat and plant size.  
400 The discussion focuses on traits under divergent selection, evidence for evolutionary constraints,  
401 and hypotheses on the selection environment and adaptive strategies.

402

403 *Trait differences between low- and high-elevation species*



404 Generalized linear models and evolutionary models mainly overlapped in pointing to differences in  
405 traits depending on whether species had low- or high elevation distributions (Table 4). The traits  
406 that were consistently different between low- and high-elevation species in the two types of models  
407 depicted plant size (i.e., ASYM, LA), leaf morphology (i.e., LDMC, SLA), the response of speed of  
408 growth to stress, and thermal resistance.

409         Across growth environments, alpine species had smaller leaves and less dry matter content  
410 in leaves (Tab. 4, Fig. 1B, C and A3 Fig. 1H, J). Evolutionary models supported that optima for  
411 plant size were at smaller values for high-compared to low-elevation species under all growth  
412 conditions. Furthermore, they supported an optimum at lower LDMC under growth conditions with  
413 regular frost, and as a trend an optimum at higher SLA, which is typically inversely related to  
414 LDMC, under mild conditions or conditions with regular heat. Results for size are in line with  
415 previous studies on multi-species comparisons, which reported a reduction in leaf size with  
416 increasing elevational distribution (Qi et al. 2014; Zhong et al. 2014). In contrast, previous studies  
417 reported either higher LDMC and smaller SLA (Körner et al. 1986; Qi et al. 2014; Rosbakh et al.  
418 2014; Midolo et al. 2019), or the contrary (Zhong et al. 2014) as found for the Brassicaceae. Lower  
419 LDMC and higher SLA are typically associated with a strategy of fast assimilation and growth but  
420 weak hardiness and short leaf life-span (Pérez-Harguindeguy et al. 2013).

421         The other type of trait that generally differed between low- and high-elevation species was  
422 the response to heat during the growth phase. Both heat and frost caused plants and their leaves to  
423 be smaller, indicating that conditions were generally stressful. Furthermore, plants speeded up  
424 growth under these conditions; the time to reach the midpoint of asymptotic size was shorter (-  
425 XMID), and under the regular occurrence of heat bouts, also the maximum growth rate was higher  
426 (MGR). An important finding of this study is that higher- compared to lower-elevation species  
427 could accelerate growth under conditions with regular heat bouts even more (MGR, -XMID; Fig.  
428 1A, E, F), at the cost that their leaves were more reduced (Fig. 1B, G). Evolutionary models too  
429 provided evidence that tolerance for speeding up growth (TOL\_MGR, TOL\_-XMID) under heat

430 had an optimum at higher values in high-elevation species. Evolutionary models pointed also to an  
431 optimum at higher values for tolerance of speeding up growth under frost (as a trend). Results  
432 suggest general selection for escape strategies under stress, and that high-elevation species seem to  
433 have adapted to exploit heat phases better by growing faster when they occur. The finding is novel  
434 and needs verification in more plant families.

435 Interestingly, low- and high-elevation species also differed in thermal resistance, though not  
436 in the direction that was previously advocated. Our mixed-effects analysis supported that heat  
437 resistance decreased with median elevational of species distribution. Evolutionary models supported  
438 a lower optimum for basal heat resistance in high-elevation species, but a higher optimum of  
439 acclimation-based heat resistance. However, increased frost resistance (after acclimation) in high-  
440 elevation species was only reported for the first round of sowing but not the second (-12 °C S1 vs -  
441 10 °C S2, A3 Fig. 1R), and the result was significant only when phylogeny was not considered (A3,  
442 model 15). In contrast, a number of earlier studies documented rather consistently that high-  
443 elevation tree species were more frost resistant (Körner 2003; Taschler and Neuner 2004; Neuner  
444 2014; Neuner et al. 2020; Schrieber et al. 2020). The discrepancy may have two potential reasons.  
445 First, the latter studies did not account for phylogeny in their analysis, which could have produced  
446 increased type I error (Li and Ives 2017). Second, there may be fundamental differences between  
447 trees and herbaceous plants in the role of frost resistance on distribution limits because of  
448 differences in the life history or the plant architecture and functioning.

449 In summary, the picture that emerges is that high- compared to low-elevation species are fast  
450 growers when it is warm, but have reduced size, have less hardy leaves and are neither particularly  
451 heat- nor frost-resistant.

452

#### 453 *Trade-offs and evolutionary inertia*

454 We detected trade-offs among traits that contributed most to the differentiation between low- and  
455 high-elevation species (Tab. 4, A5). Specific leaf area under heat was negatively related with leaf

456 area ( $LA_{Mild}$ , Fig 2A). In turn, leaf area under mild conditions was negatively correlated with heat  
457 tolerance based on the mid-point of growth ( $TOL_{-XMID}$ , Fig. 2B). Before discussing the two  
458 results in a more general context, it is to note that when analyses were done, a fraction of traits,  
459 which were actually calculated on the basis of trait-growth environment combinations, had already  
460 been excluded because of redundancy in information. The phenotypic aspect that the remaining  
461 traits represented was therefore probably larger. Based on this reasoning, we can say that an  
462 important trade-off was between assimilation efficiency combined with less leaf hardness (high  
463 SLA) under heat and (plant) size. Another was between size and the capacity to speed up growth  
464 under heat. In other words, there is good macroevolutionary evidence that fast growth under heat,  
465 small size and assimilation potent leaves with less dry mass come as a syndrome of high-elevation  
466 species, shaped by trade-offs. Whether these trade-offs occur on a within-species level and may  
467 constrain adaptive evolution and niche expansion at range edges remains to be tested.

468 Trade-offs involving thermal resistance or tolerance were also found, but may have little  
469 impact on species distribution. Weak to moderate negative relationships were detected between  
470 non-acclimated resistances (to cold or heat) and assimilatory capacity (SLA, number of leaves; A5).  
471 But, resistance did not figure among the nine most relevant traits in differentiating low- and high-  
472 elevation species in a multivariate space (Tab. 4; Fig. 2; A5).

473 Considerable evolutionary half-lives of traits important in driving elevational distribution  
474 were found. The highest value of phylogenetic inertia was found for leaf area, one of the two most  
475 discriminating traits between low- and high-elevation species (Fig. 2, A5). The half-life was  
476 estimated to be ~26Mya when leaf area was expressed under the regular occurrence of heat (Tab. 3,  
477 A4). Also asymptotic size and leaf dissection index (under regular occurrence of frost) had  
478 considerable half-lives, between 11 and 15 Mya. The remaining traits (i.e., IGR, SLA, LTH,  
479  $TOL_{IGR}$  and  $-TOL_{XMID}$ ) had lower, but still considerable values ranging from ~1.5 Mya for  
480 heat tolerance based on the time until fastest growth, to 9.5 Mya for leaf thickness under cold  
481 conditions. This considerable half-lives generally indicate constraints to adaptive evolution.

482

483 *Selection environment, adaptive strategies and evolutionary constraints*

484 Insights discussed above and further ones gained from analyses evoke novel hypotheses on the

485 causes of limits to niche evolution and disparate elevational or climatic distribution.

486 Evidence for divergent adaptation between low- and high-elevation species was more

487 common for traits recorded under mild and heat conditions compared to the regular occurrence of

488 frost (Tab. 3, Tab. 4). This strongly supports that high-elevation species have adaptively diverged

489 on exploiting warm conditions and not (so much) to resist the cold. This is a very important insight,

490 and also – as a side note – warrants attention that the detection of traits under selection is

491 environment-dependent. Comparative studies typically rely on measurements taken in the field or

492 on collection material (e.g., Luxbacher and Knouft 2009; Edwards and Smith 2010), or after raising

493 organisms under standard conditions (e.g., Kellermann et al. 2012; Mason and Donovan 2015).

494 While the former brings the problem of the inability of separating the effects of genetics and the

495 environment on trait differences, the latter has the flaw that the adaptive potential of a trait may not

496 be detected as the environment is not the one in which divergence is expressed. Again, for

497 Brassicaceae along the elevational gradient, it is mild and heat conditions that are likely to have

498 played more of a role in adaptive divergence.

499 Several insights speak in favour that high-elevation conditions select for faster growth at the

500 cost of small size and possibly a shorter life, with the environmental driver being the short growing

501 season. On the one hand, our study showed that plants of high elevations were not better at coping

502 with cold, but they had evolved to better exploit warm conditions for fast growth. In line, previous

503 eco-physiological studies reported higher photosynthetic rate in alpine herbaceous species

504 cultivated at warmer temperature (Mächler and Nösberger 1977) or during daily warm spells in the

505 wild (Körner and Diemer 1987), pointing to faster resource acquisition under warm conditions.

506 Furthermore, niche-modelling suggested that upper ranges were constrained not primarily by the

507 direct effect of cool temperatures but the brevity of the growing season (Morin et al. 2007; Patsiou

508 et al. 2021). These studies too pointed to speed of growth or development being under selection  
509 under higher-elevation conditions. Based on the two sets of insights, we propose that whether a  
510 species (of Brassicaceae) can live at high elevation depends on the ability to cope with the short  
511 growing season, which is achieved by maximising growth during short thermal windows when the  
512 temperature is relatively high. Superficially, the geographic pattern may resemble counter-gradient  
513 variation (Conover and Schultz 1995), where high-elevation genotypes grow faster while their  
514 environment may generally cause growth to be slow. One distinction is that the heightened  
515 acceleration of growth is expressed only under warmer conditions, and a second is that the relevant  
516 environmental difference seems to be the shorter growing season.

517         Analyses on trade-offs pointed to leaf morphology being coupled with fast growth under  
518 heat and reduced plant size. Speeding up growth under heat was negatively correlated with leaf size,  
519 while small life size implied higher SLA (related with lower LDMC) – generally thinner leaves  
520 with higher assimilation capacity (Fig. 2A, B). The importance of the leaf morphology in this  
521 context adds a further notion of a constraint of fast growth. According to the world-wide leaf  
522 economics spectrum (Wright et al. 2004), species either follow a strategy of quick return on  
523 investment, with nutrient-rich leaves, high photosynthetic rates, and short life-spans *versus* a  
524 strategy of slow return, with expensive but long-lived leaves. In a broader context, the continuum of  
525 fast production versus slowness is also reflected in the concept of r/K selection (Pianka 1970),  
526 where r-selected species grow more rapidly, but to a smaller size and they reproduce earlier, while  
527 K-selected species grow more slowly, but to larger size and they reproduce later. For plants, the  
528 concept was expanded, with now three strategies – stress-tolerant (S), competitive (C), ruderal (R) –  
529 being positioned along three axes of environmental gradients, of abiotic stress, competition and  
530 disturbance (Grime 1977). Pierce et al. (2013) showed how these strategies can be correctly  
531 attributed with the use of the same leaf-traits that show the main trade-offs in our work, i.e., leaf  
532 area, leaf dry matter content and specific leaf area. However, and in contrary to their reports,  
533 LDMC and LA did not form separate axes in our study. Nonetheless, following their sorting

534 suggests that alpine (Brassicaceae) species primarily follow an r-strategy, whereas lowland species  
535 follow a C/S (or K) strategy, at least in relation to temperature responses.

536 Finally, also phylogenetic inertia of traits was found to depend on the environment in which  
537 they were expressed (Tab. 3, A4 Fig. 1A, B). In our study, the mild and heat treatments were not  
538 only the more discriminating among low- and high-elevation species, they were also those in which  
539 traits had on average higher phylogenetic inertia. The phylogenetic half-life of traits expressed  
540 under mild and heat was 50% higher compared to trait expression under the regular occurrence of  
541 frost. Results therefore suggest that adaptation to exploit or live under generally warmer conditions  
542 is more constrained. The result is in line with a recent large-scale phylogenetic analysis, showing  
543 that across plants and animals, the rate of adaptation to warm was much slower than to cold, both in  
544 endotherms and ectotherms (Bennet et al. 2021).

545

## 546 **CONCLUSION**

547 Our study highlights that the most discriminating traits separating high- from low-elevation  
548 Brassicaceae species are their ability to speed up growth under conditions with heat bouts, at the  
549 cost of much reduced leaf and plant size, and possibly a more ephemeral lifestyle with less  
550 investment into leaves. Results suggest a general trade-off between exploiting the short vegetation  
551 period at high elevation and being less enduring in general or under certain thermal extremes or  
552 under competition. The trade-off could be a result of multivariate selection differing among low-  
553 and high-elevation sites and/or negative genetic correlations. In parallel, we found that thermal  
554 resistance did not play a strong role in differentiating species along the elevational gradient. Finally,  
555 we found evidence that divergent adaptation under conditions with regular heat was more  
556 pronounced compared to conditions with regular frost, and that adaptation to heat was more  
557 constrained.

558

559

560

561 **Declaration of authorship**

562 AM and YW conceived the study and conducted the field work. AM executed the experimental  
563 work, run the statistical analyses and wrote the first draft of the manuscript. YW contributed to  
564 writing. All authors gave final approval for publication.

565

566 **Acknowledgements**

567 We thank Lea Bona, Camilla Jenny, Adrian Möhl, Ramon Müller, Jens Paulsen, Florian Schreier,  
568 and Daniel Slodowicz, for collecting seeds in the field. Georg Ambruster, Olivier Bachmann,  
569 Markus Funk, Kay Lucek, Michela Meier, Jens Paulsen, Theofania-Sotiria Patsiou, Antoine Perrier,  
570 Susanna Riedl, Dario Sanchez-Castro, Martinez Sylvia and Nora Walden, helped with sowing  
571 seeds, taking plant measures and fruitful discussions. Finally, we would like to thank all the field  
572 botanists that contributed to the collection of occurrence data for the InfoFlora database.

573

574 **Conflict of interest**

575 The authors declare that they have no conflict of interest.

576

577 **SUPPLEMENTARY MATERIAL**

578 A1 – List of species and populations used in this study

579 A2 – Additional information on traits measurement and methods for validating evolutionary models

580 A3 – Mixed-effects model on the relationship between traits, treatment and elevational distribution  
581 and data distribution.

582 A4 – Model of trait evolution (WN, BM, BMM, OU, OUM), optimal trait values, AICc  
583 distribution, phylogenetic half-life and simulations

584 A5 – Multivariate analysis, and Pearson's correlation

585

586 **REFERENCES**

- 587 Addo-Bediako, A., S. L. Chown, and K. J. Gaston. 2000. Thermal tolerance, climatic variability and  
588 latitude. *Proc. R. Soc. B.* 267:739–745.
- 589 Aeschimann, D., K. Lauber, D. M. Moser, and J.-P. Theurillat. 2004. *Flora alpina*. Éditions Belin.
- 590 Agrawal, A. A., J. K. Conner, and J. R. Stinchcombe. 2004. Evolution of plant resistance and  
591 tolerance to frost damage. *Ecol. Lett.* 7:1199–1208.
- 592 Al-Shehbaz, I. A., M. A. Beilstein, and E. A. Kellogg. 2006. Systematics and phylogeny of the  
593 Brassicaceae (Cruciferae): an overview. *Plant Syst. Evol.* 259:89–120.
- 594 Angilletta, M. J. 2009. *Thermal adaptation: a theoretical and empirical synthesis*. Oxford Univ.  
595 Press, Oxford, U.K.
- 596 Beaulieu, J. M., D. C. Hwang C. Boettiger, and B. C. O'Meara. 2015. Modelling stabilizing  
597 selection: expanding the Ornstein–Uhlenbeck model of adaptive evolution. *Evolution*  
598 66:2369–2383.
- 599 Bell, G. 1984. Measuring the cost of reproduction. I. The correlation structure of the life table of a  
600 plank rotifer. *Evolution* 38:300–313.
- 601 Bennett, A. F., and R. E. Lenski. 2007. An experimental test of evolutionary trade-offs during  
602 temperature adaptation. *Proc. Natl. Acad. Sci.* 104:8649–8654.
- 603 Bennett, J. M., Sunday, J., Calosi, P., Villalobos, F., Martínez, B., Molina-Venegas, R., ... & Olalla-  
604 Tàrraga, M. Á. (2021). The evolution of critical thermal limits of life on Earth. *Nat.*  
605 *Commun.*, 12, 1–9.
- 606 Blom, M. P. K., P. Horner, and C. Moritz. 2016. Convergence across a continent: adaptive  
607 diversification in a recent radiation of Australian lizards. *Proc. R. Soc. B.* 283:20160181.
- 608 Boucher, F. C., W. Thuiller, C. Roquet, R. Douzet, S. Aubert, N. Alvarez, and S. Lavergne. 2012.  
609 Reconstructing the origins of high-alpine niches and cushion life form in the genus  
610 *Androsace s.l.* (Primulaceae). *Evolution* 66:1255–1268.



- 611 Bozinovic, F., M. J. M. Orellana, S. I. Martel, and J. M. Bogdanovich. 2014. Testing the heat-  
612 invariant and cold-variability tolerance hypotheses across geographic gradients. *Comp.*  
613 *Biochem. Physiol. A. Mol. Integr. Physiol.* 178:46–50.
- 614 Briceño, V. F., D. Harris-Pascal, A. B. Nicotra, E. Williams, and M. C. Ball. 2014. Variation in  
615 snow cover drives differences in frost resistance in seedlings of the alpine herb *Aciphylla*  
616 *glacialis*. *Environ. Exp. Bot.* 106:174–181.
- 617 Bucher, S. F., R. Feiler, O. Buchner, G. Neuner, S. Rosbakh, M. Leiterer, and C. Römermann.  
618 2019. Temporal and spatial trade-offs between resistance and performance traits in  
619 herbaceous plant species. *Environ. Exp. Bot.* 157:187–196.
- 620 Bürkner, P.C. 2017. Advanced Bayesian multilevel modeling with the R package brms.  
621 ArXiv170511123 Stat.
- 622 Butler, M. A., and A. A. King. 2004. Phylogenetic comparative analysis: a modeling approach for  
623 adaptive evolution. *Am. Nat.* 164:683–695.
- 624 Cahill, A. E., M. E. Aiello-Lammens, M. C. Fisher-Reid, X. Hua, C. J. Karanewsky, H. Y. Ryu, G.  
625 C. Sbeglia, F. Spagnolo, J. B. Waldron, and J. J. Wiens. 2014. Causes of warm-edge range  
626 limits: systematic review, proximate factors and implications for climate change. *J.*  
627 *Biogeogr.* 41:429–442.
- 628 Casanueva, M. O., A. Burga, and B. Lehner. 2012. Fitness trade-offs and environmentally induced  
629 mutation buffering in isogenic *C. elegans*. *Science* 335:82–85.
- 630 Clavel J, Escarguel G, and Merceron G. 2015. mvMORPH: an R package for fitting multivariate  
631 evolutionary models to morphometric data. *Methods Ecol. Evol.* 6:1311–1319.
- 632 Connallon, T., and C. M. Sgrò. 2018. In search of a general theory of species' range evolution.  
633 *PLoS Biol.* 16:e2006735.
- 634 Conover, D. O., and E. T. Schultz. 1995. Phenotypic similarity and the evolutionary significance of  
635 countergradient variation. *Trends Ecol. Evol.* 10:248–252. Cooper, N., W. Jetz, and R. P.

- 636 Freckleton. 2010. Phylogenetic comparative approaches for studying niche conservatism. *J.*  
637 *Evol. Biol.* 23:2529–2539.
- 638 Dahl, E. 1951. On the Relation between summer temperature and the distribution of alpine vascular  
639 plants in the lowlands of Fennoscandia. *Oikos* 3:22–52.
- 640 Donoghue, M. J. 2008. A phylogenetic perspective on the distribution of plant diversity. *Proc. Natl.*  
641 *Acad. Sci.* 105:11549–11555.
- 642 Edwards, E. J., and S. A. Smith. 2010. Phylogenetic analyses reveal the shady history of C4 grasses.  
643 *Proc. Natl. Acad. Sci.* 107:2532–2537.
- 644 Falconer, D. S., and T. F. C. Mackay. 1996. Introduction to quantitative genetics. Longmans Green,  
645 Harlow, Essex, U.K.
- 646 Futuyama, D. J., and G. Moreno. 1988. The evolution of ecological specialization. *Annu. Rev. Ecol.*  
647 *Syst.* 19:207–233.
- 648 Garamszegi, L. Z. 2014. Modern phylogenetic comparative methods and their application in  
649 evolutionary biology: concepts and practice. Springer, Berlin Heidelberg, Germany.
- 650 Gaston, K. J. 2003. The structure and dynamics of geographic ranges. Oxford Univ. Press, Oxford,  
651 U.K.
- 652 Gómez, C., E. A. Tenorio, P. Montoya, and C. D. Cadena. 2016. Niche-tracking migrants and  
653 niche-switching residents: evolution of climatic niches in New World warblers (Parulidae).  
654 *Proc. R. Soc. B.* 283:20152458.
- 655 Gratani, L. 2014. Plant phenotypic plasticity in response to environmental factors. *Adv. Bot.*  
656 2014:208747.
- 657 Grime, J. P. 1977. Evidence for the existence of three primary strategies in plants and its relevance  
658 to ecological and evolutionary theory. *Am. Nat.* 111:1169–1194.
- 659 Harmon L. J, J. T Weir, C. D Brock, R. E Glor, and W. Challenger. 2008. GEIGER: investigating  
660 evolutionary radiations. *Bioinformatics* 24:129–131.

- 661 Harrell, J., Frank E., and with contribution from Charles Dupont and many others. 2019. Hmisc:  
662 Harrell Miscellaneous. R package version 4.2-0.
- 663 Hawkins, B. A., M. Rueda, T. F. Rangel, R. Field, and J. A. F. Diniz-Filho. 2014. Community  
664 phylogenetics at the biogeographical scale: cold tolerance, niche conservatism and the  
665 structure of North American forests. *J. Biogeogr.* 41:23–38.
- 666 Herrando-Pérez, S. 2013. Climate change heats matrix population models. *J. Anim. Ecol.* 82:1117–  
667 1119.
- 668 Hoffmann, A. A., R. Hallas, A. R. Anderson, and M. Telonis-Scott. 2005. Evidence for a robust  
669 sex-specific trade-off between cold resistance and starvation resistance in *Drosophila*  
670 *melanogaster*. *J. Evol. Biol.* 18:804–810.
- 671 Houle, D. 1992. Comparing evolvability and variability of quantitative traits. *Genetics* 130:195–  
672 204.
- 673 Hutchinson, G. E. 1957. Concluding Remarks. *Cold Spring Harb. Symp. Quant. Biol.* 22:415–427.
- 674 Iversen, J. 1944. *Viscum, Hedera* and *Ilex* as climate indicators. *Geol. Fören. Stockh. Förh.* 66:463–  
675 483.
- 676 Jombart, T. 2008. adegenet: a R package for the multivariate analysis of genetic markers.  
677 *Bioinformatics* 24:1403–1405.
- 678 Kappen, L. 1981. Ecological significance of resistance to high temperature. Pp. 439–474 in O. L.  
679 Lange, P. S. Nobel, C. B. Osmond, and H. Ziegler, eds. *Physiological plant ecology I: responses to the physical environment*. Springer, Berlin Heidelberg, Germany.
- 680
- 681 Kellermann, V., J. Overgaard, A. A. Hoffmann, C. Fløjgaard, J.-C. Svenning, and V. Loeschcke.  
682 2012. Upper thermal limits of *Drosophila* are linked to species distributions and strongly  
683 constrained phylogenetically. *Proc. Natl. Acad. Sci.* 109:16228–16233.
- 684 Kelly, M. W., R. K. Grosberg, and E. Sanford. 2013. Trade-offs, geography, and limits to thermal  
685 adaptation in a Tide Pool Copepod. *Am. Nat.* 181:846–854.
- 686 Kingsolver, J. G. 2009. The well-temperated biologist. *Am. Nat.* 174:755–768.

- 687 Kingsolver, J. G., and S. E. Diamond. 2011. Phenotypic selection in natural populations: what  
688 limits directional selection? *Am. Nat.* 177:346–357.
- 689 Koehler, K., A. Center, and J. Cavender-Bares. 2012. Evidence for a freezing tolerance–growth rate  
690 trade-off in the live oaks (*Quercus series Virentes*) across the tropical–temperate divide.  
691 *New Phytol.* 193:730–744.
- 692 Körner, C. 2003. *Alpine plant life: functional plant ecology of high mountain ecosystems*. 2nd ed.  
693 Springer, Berlin Heidelberg, Germany.
- 694 Körner, C., D. Basler, G. Hoch, C. Kollas, A. Lenz, C. F. Randin, Y. Vitasse, and N. E.  
695 Zimmermann. 2016. Where, why and how? Explaining the low-temperature range limits of  
696 temperate tree species. *J. Ecol.* 104:1076–1088.
- 697 Körner, C., P. Bannister, and A. F. Mark. 1986. Altitudinal variation in stomatal conductance,  
698 nitrogen content and leaf anatomy in different plant life forms in New Zealand. *Oecologia*  
699 69:577–588.
- 700 Körner, C., and M. Diemer. 1987. *In situ* photosynthetic responses to light, temperature and carbon  
701 dioxide in herbaceous plants from low and high altitude. *Funct. Ecol.* 1:179–194.
- 702 Kostikova, A., G. Litsios, N. Salamin, and P. B. Pearman. 2013. Linking life-history traits, ecology,  
703 and niche breadth evolution in North American Eriogonoids (Polygonaceae). *Am. Nat.*  
704 182:760–774.
- 705 Larcher, W. and J. Wagner. 1976. Temperaturgrenzen der CO<sub>2</sub>-Aufnahme und Temperaturresistenz  
706 der Blätter von Gebirgspflanzen im vegetationsaktiven Zustand. *Oecol. Plant.* 11:361–374.
- 707 Lee-Yaw, J. A., H. M. Kharouba, M. Bontrager, C. Mahony, A. M. Csergő, A. M. E. Noreen, Q. Li,  
708 R. Schuster, and A. L. Angert. 2016. A synthesis of transplant experiments and ecological  
709 niche models suggests that range limits are often niche limits. *Ecol. Lett.* 19:710–722.
- 710 Leibold, M. A. 1995. The niche concept revisited: mechanistic models and community context.  
711 *Ecology* 76:1371–1382.

- 712 Lenz, A., G. Hoch, Y. Vitasse, and C. Körner. 2013. European deciduous trees exhibit similar  
713 safety margins against damage by spring freeze events along elevational gradients. *New*  
714 *Phytol.* 200:1166–1175.
- 715 Li, D., and A. R. Ives. 2017. The statistical need to include phylogeny in trait-based analyses of  
716 community composition. *Methods Ecol. Evol.* 8:1192–1199.
- 717 Litsios, G., A. Kostikova, and N. Salamin. 2014. Host specialist clownfishes are environmental  
718 niche generalists. *Proc. R. Soc. B.* 281:20133220.
- 719 Loehle, C. 1998. Height growth rate tradeoffs determine northern and southern range limits for  
720 trees. *J. Biogeogr.* 25:735–742.
- 721 Louthan, A. M., D. F. Doak, and A. L. Angert. 2015. Where and when do species interactions set  
722 range limits? *Trends Ecol. Evol.* 30:780–792.
- 723 Luckinbill, L. S. 1998. Selection for longevity confers resistance to low-temperature stress in  
724 *Drosophila melanogaster*. *J. Gerontol. Ser. A* 53A:B147–B153.
- 725 Luxbacher, A. M., and J. H. Knouft. 2009. Assessing concurrent patterns of environmental niche  
726 and morphological evolution among species of horned lizards (*Phrynosoma*). *J. Evol. Biol.*  
727 22:1669–1678.
- 728 MacArthur, R. H. 1972. *Geographical ecology*. Harper & Row, Princeton Univ. Press, Princeton, NJ.
- 729 Macek, P., J. Macková, and F. de Bello. 2009. Morphological and ecophysiological traits shaping  
730 altitudinal distribution of three *Polylepis* treeline species in the dry tropical Andes. *Acta*  
731 *Oecologica* 35:778–785.
- 732 Mächler, F., and J. Nösberger. 1977. Effect of light intensity and temperature on apparent  
733 photosynthesis of altitudinal ecotypes of *Trifolium repens* L. *Oecologia* 31:73–78.
- 734 Makowski, D., Ben-Shachar, M. S., & Lüdecke, D. (2019). bayestestR: Describing effects and their  
735 uncertainty, existence and significance within the Bayesian framework. *Journal of Open*  
736 *Source Software*, 4, 1541.

- 737 Mason, C. M., and L. A. Donovan. 2015. Evolution of the leaf economics spectrum in herbs:  
738 evidence from environmental divergences in leaf physiology across *Helianthus*  
739 (*Asteraceae*). *Evolution* 69:2705–2720.
- 740 Midolo, G., P. D. Frenne, N. Hölzel, and C. Wellstein. 2019. Global patterns of intraspecific leaf  
741 trait responses to elevation. *Glob. Change Biol.* 25:2485–2498.
- 742 Mockett, R. J., and R. S. Sohal. 2006. Temperature-dependent trade-offs between longevity and  
743 fertility in the *Drosophila* mutant, methuselah. *Exp. Gerontol.* 41:566–573.
- 744 Molina-Montenegro, M. A., J. Gallardo-Cerda, T. S. M. Flores, and C. Atala. 2012. The trade-off  
745 between cold resistance and growth determines the *Nothofagus pumilio* treeline. *Plant Ecol.*  
746 213:133–142.
- 747 Morin, X., C. Augspurger, and I. Chuine. 2007. Process-based modeling of species' distributions:  
748 what limits temperate tree species' range boundaries? *Ecology* 88:2280–2291.
- 749 Mousseau, T. A., D. A. Roff. 1987. Natural selection and the heritability of fitness components.  
750 *Heredity* 59:181–197.
- 751 Moser D., Gygax A., Bäumier B., Wyler N., Palese R. 2002. Rote Liste der gefährdeten Farn- und  
752 Blütenpflanzen der Schweiz. BAFU, Switzerland.
- 753 Neuner, G. 2014. Frost resistance in alpine woody plants. *Front. Plant Sci.* 5:654.
- 754 Neuner, G., B. Huber, A. Plangger, J.-M. Pohl, and J. Walde. 2020. Low temperatures at higher  
755 elevations require plants to exhibit increased freezing resistance throughout the summer  
756 months. *Environ. Exp. Bot.* 169:103882.
- 757 Normand, S., U. A. Treier, C. Randin, P. Vittoz, A. Guisan, and J.-C. Svenning. 2009. Importance  
758 of abiotic stress as a range-limit determinant for European plants: insights from species  
759 responses to climatic gradients. *Glob. Ecol. Biogeogr.* 18:437–449.
- 760 Norry, F. M., F. H. Gomez, and V. Loeschcke. 2007. Knockdown resistance to heat stress and slow  
761 recovery from chill coma are genetically associated in a quantitative trait locus region of  
762 chromosome 2 in *Drosophila melanogaster*. *Mol. Ecol.* 16:3274–3284.

- 763 Norry, F. M., and V. Loeschke. 2002. Temperature-induced shifts in associations of longevity with  
764 body size in *Drosophila melanogaster*. *Evolution* 56:299–306.
- 765 Orme, D., R. Freckleton, T. Gavin, T. Petzoldt, S. Fritz, N. Isaac, and W. Pearse. 2018. caper:  
766 comparative analyses of phylogenetics and evolution in R. R package version 1.0.1.
- 767 Patsiou, T. S., N. Walden, and Y. Willi. 2021. What drives species distribution along elevational  
768 gradients? Macroecological and -evolutionary insights from Brassicaceae species of central  
769 Alps. What drives species distribution along elevational gradients? *Global Ecol. Biogeogr.*  
770 30:1030-1042
- 771 Pérez, F., L. F. Hinojosa, C. G. Ossa, F. Campano, and F. Orrego. 2014. Decoupled evolution of  
772 foliar freezing resistance, temperature niche and morphological leaf traits in Chilean  
773 *Myrceugenia*. *J. Ecol.* 102:972–980.
- 774 Pérez-Harguindeguy, N., S. Díaz, E. Garnier, S. Lavorel, H. Poorter, P. Jaureguiberry, et al and J.  
775 H. C. Cornelissen. 2013. New handbook for standardised measurement of plant functional  
776 traits worldwide. *Aust. J. Bot.* 61:167–234.
- 777 Pianka, E. R. 1970. On r- and K-selection. *Am. Nat.* 104:592–597.
- 778 Pigott, C. D., and J. P. Huntley. 1981. Factors controlling the distribution of *Tilia cordata* at the  
779 northern limits of its geographical range III. Nature and causes of seed sterility. *New Phytol.*  
780 87:817–839.
- 781 Pierce, S., Brusa, G., Vagge, I., and Cerabolini, B. E. 2013. Allocating CSR plant functional types:  
782 the use of leaf economics and size traits to classify woody and herbaceous vascular plants.  
783 *Funct. Ecol.*, 27:1002-1010.
- 784 Pither, J. 2003. Climate tolerance and interspecific variation in geographic range size. *Proc. R. Soc.*  
785 B. 270:475–481.
- 786 Qi, W., H. Bu, K. Liu, W. Li, J. M. H. Knops, J. Wang, W. Li, and G. Du. 2014. Biological traits  
787 are correlated with elevational distribution range of eastern Tibetan herbaceous species.  
788 *Plant Ecol.* 215:1187–1198.

- 789 R Core Team. 2014. A language and environment for statistical computing. R Foundation for  
790 Statistical Computing, Vienna. Vienna Austria.
- 791 Rizzo, M. L., and G. J. Székely. 2016. Energy distance. *WIREs Comput. Stat.* 8:27–38.
- 792 Rodrigues, J. F. M., F. Villalobos, J. B. Iverson, J. Alexandre, and J. A. F. Diniz-Filho. 2019.  
793 Climatic niche evolution in turtles is characterized by phylogenetic conservatism for both  
794 aquatic and terrestrial species. *J. Evol. Biol.* 32:66-75.
- 795 Roff, D. A., and D. J. Fairbairn. 2012. A test of the hypothesis that correlational selection generates  
796 genetic correlations. *Evolution* 66:2953–2960.
- 797 Root, T. 1988. Energy Constraints on avian distributions and abundances. *Ecology* 69:330–339.
- 798 Rosbakh, S., M. Bernhardt-Römermann, and P. Poschlod. 2014. Elevation matters: contrasting  
799 effects of climate change on the vegetation development at different elevations in the  
800 Bavarian Alps. *Alp. Bot.* 124:143–154.
- 801 Rose, M. R. 1983. Further models of selection with antagonistic pleiotropy. Pp. 47–53 in H. I.  
802 Freedman and C. Strobeck, eds. *Population Biology*. Springer, Berlin Heidelberg, Germany.
- 803 Rosenzweig, M. L., and R. M. L. 1995. Species diversity in space and time. Cambridge Univ. Press,  
804 Cambridge, U.K.
- 805 Sakai, A., and W. Larcher. 2012. Frost survival of plants: responses and adaptation to freezing  
806 stress. Springer Science & Business Media.
- 807 Salisbury, E. J. 1926. The geographical distribution of plants in relation to climatic factors. *Geogr.*  
808 *J.* 67:312–335.
- 809 Schluter, D. 2001. Ecology and the origin of species. *Trends Ecol. Evol.* 16:372–380.
- 810 Schrieber, K., Y. Cáceres, A. Engelmann, P. Marcora, D. Renison, I. Hensen, and C. Müller. 2020.  
811 Elevational differentiation in metabolic cold stress responses of an endemic mountain tree.  
812 *Environ. Exp. Bot.* 171:103918.
- 813 Sgrò, C. M., and A. A. Hoffmann. 2004. Genetic correlations, tradeoffs and environmental  
814 variation. *Heredity* 93:241–248.



- 815 Stoks, R., and M. De Block. 2011. Rapid growth reduces cold resistance: evidence from latitudinal  
816 variation in growth rate, cold resistance and stress proteins. *PLoS ONE* 6:e16935.
- 817 Sunday, J. M. Bennett, P. Calosi, S. Clusella-Trullas, S. Gravel, A. L. Hargreaves, F. P. Leiva, W.  
818 C. E. P. Verberk, M. Á. Olalla-Tárraga, and I. Morales-Castilla. 2019. Thermal tolerance  
819 patterns across latitude and elevation. *Philos. Trans. R. Soc. B.* 374:20190036.
- 820 Sunday, J. M., A. E. Bates, and N. K. Dulvy. 2012. Thermal tolerance and the global redistribution  
821 of animals. *Nat. Clim. Change* 2:686–690.
- 822 Sutinen, M.-L., R. Arora, M. Wisniewski, E. Ashworth, R. Strimbeck, and J. Palta. 2001.  
823 Mechanisms of frost survival and freeze-damage in nature. Pp. 89–120 *in* F. J. Bigras and S.  
824 J. Colombo, eds. *Conifer cold hardiness*. Springer, Dordrecht, Netherlands.
- 825 Taschler, D., and G. Neuner. 2004. Summer frost resistance and freezing patterns measured *in situ*  
826 in leaves of major alpine plant growth forms in relation to their upper distribution boundary.  
827 *Plant Cell Environ.* 27:737–746.
- 828 Thakur, D., N. Rathore, and A. Chawla. 2019. Increase in light interception cost and metabolic  
829 mass component of leaves are coupled for efficient resource use in the high altitude  
830 vegetation. *Oikos* 128:254–263.
- 831 Tonnabel, J., F. M. Schurr, F. Boucher, W. Thuiller, J. Renaud, E. J. P. Douzery, and O. Ronce.  
832 2018. Life-history traits evolved jointly with climatic niche and disturbance regime in the  
833 genus *Leucadendron* (Proteaceae). *Am. Nat.* 191:220–234.
- 834 Urban, M. C. 2007. The growth–predation risk trade-off under a growing gape-limited predation  
835 threat. *Ecology* 88:2587–2597.
- 836 van Noordwijk, A. J., and G. de Jong. 1986. Acquisition and allocation of resources: their influence  
837 on variation in life history tactics. *Am. Nat.* 128:137–142.
- 838 Vetaas, O. R. 2002. Realized and potential climate niches: a comparison of four *Rhododendron* tree  
839 species. *J. Biogeogr.* 29:545–554.

- 840 Wagner, G. P., and K. Schwenk. 2000. Evolutionarily stable configurations: functional integration  
841 and the evolution of phenotypic stability. Pp. 155–217 in M. K. Hecht, R. J. Macintyre, and  
842 M. T. Clegg, eds. *Evolutionary Biology*. Springer US, Boston, MA.
- 843 Walker, J. A. 2007. A general model of functional constraints on phenotypic evolution. *Am. Nat.*  
844 170:681–689.
- 845 Wen, Y., D. Qin, B. Leng, Y. Zhu, and K. Cao. 2018. The physiological cold tolerance of warm-  
846 climate plants is correlated with their latitudinal range limit. *Biol. Lett.* 14:20180277.
- 847 Willi, Y., and J. Van Buskirk. 2019. A practical guide to the study of distribution limits. *Am. Nat.*  
848 193:773–785.
- 849 Williams, B. R., B. V. Heerwaarden, D. K. Dowling, and C. M. Sgrò. 2012. A multivariate test of  
850 evolutionary constraints for thermal tolerance in *Drosophila melanogaster*. *J. Evol. Biol.*  
851 25:1415–1426.
- 852 Wright, I. J., P. B. Reich, M. Westoby, D. D. Ackerly, Z. Baruch, F. Bongers, J. et al. and R. Villar.  
853 2004. The worldwide leaf economics spectrum. *Nature* 428:821–827.
- 854 Wos, G., and Y. Willi. 2015. Temperature-stress resistance and tolerance along a latitudinal cline in  
855 North American *Arabidopsis lyrata*. *PLOS ONE* 10:e0131808.
- 856 Zhong, M., J. Wang, K. Liu, R. Wu, Y. Liu, X. Wei, D. Pan, and X. Shao. 2014. Leaf morphology  
857 shift of three dominant species along altitudinal gradient in an alpine meadow of the  
858 Qinghai-Tibetan plateau. *Pol. J. Ecol.* 62:639–648.
- 859
- 860

861 **Table 1** Results of mixed-effects models on the relationship between median elevation of species  
862 distribution, treatment during plant growth (regular frost [F], mild conditions [M], and regular heat  
863 [H]) and their interaction on plant traits  
864  
865

| Trait                                      | Trait ID                                           | Posterior median      |                                 |                                  |                                   |                                 |                               |                                  |
|--------------------------------------------|----------------------------------------------------|-----------------------|---------------------------------|----------------------------------|-----------------------------------|---------------------------------|-------------------------------|----------------------------------|
|                                            |                                                    | Treatment (F   M   H) |                                 | Elevation                        | Treatment (F   M   H) × elevation |                                 |                               |                                  |
|                                            |                                                    | F vs M                | H vs M                          |                                  | Slope of elevation under F vs M   | Slope of elevation under H vs M |                               |                                  |
| Seed size $\phi$                           | SSIZ                                               |                       |                                 | .058 [-.166, .028]               |                                   |                                 |                               |                                  |
| Time to germination $\phi$                 | TGER                                               |                       |                                 | .042 [-.017, .101]               |                                   |                                 |                               |                                  |
| Growth                                     | Initial growth rate                                | IGR                   |                                 | -0.006 [-.033, .021]             | -0.019 [-.047, .008]              | -0.009 [-.027, .011]            | .012 [-.015, .040]            | .015 [-.011, .044]               |
|                                            | <b>Maximal growth rate</b>                         | <b>MGR</b>            | <b>Fig. 1A</b>                  | -0.043 [-.126, .037]             | <b>.421 [1.338, .500]</b> ***     | -0.034 [-.093, .020]            | .012 [-.072, .089]            | <b>.128 [.046, .211]</b> *       |
|                                            | <b>(-)Time to fastest growth <math>\phi</math></b> | <b>(-)XMID</b>        |                                 | <b>1.033 [.447, 1.594]</b> **    | <b>2.114 [1.534, 2.722]</b> ***   | -0.702 [-1.292, -.105] (.)      | .357 [-.276, .961]            | <b>1.491 [.899, 2.067]</b> ***   |
|                                            | <b>Asymptotic size <math>\phi</math></b>           | <b>ASYM</b>           | <b>Fig. 1B</b>                  | <b>-1.139 [-.185, -.091]</b> *** | <b>-1.153 [.200, -.103]</b> ***   | -0.040 [-.111, .031]            | .025 [-.072, .023]            | <b>-1.134 [-.184, -.086]</b> *** |
|                                            | Number of leaves $s_2, \phi$                       | NLEA                  |                                 | <b>-.064 [-.111, -.012]</b> *    | .005 [-.043, .055]                | -0.013 [-.107, .086]            | -0.008 [-.057, .042]          | -0.025 [-.071, .025]             |
| Leaf traits                                | <b>Leaf area <math>\phi</math></b>                 | <b>LA</b>             |                                 | <b>-.162 [-.253, -.086]</b> **   | <b>-.255 [-.338, -.170]</b> ***   | <b>-.349 [-.483, -.218]</b> *** | .032 [-.051, .120]            | <b>-.117 [-.203, -.028]</b> *    |
|                                            | Specific leaf area $\phi$                          | SLA                   |                                 | <b>-.130 [-.184, -.075]</b> ***  | <b>.112 [.056, .167]</b> ***      | .018 [-.036, .075]              | -0.030 [-.083, .025]          | .018 [-.040, .072]               |
|                                            | <b>Leaf dry matter content <math>\phi</math></b>   | <b>LDMC</b>           | <b>Fig. 1C</b>                  | .042 [.006, .075] (.)            | <b>-.182 [-.216, -.146]</b> ***   | <b>-.066 [-.106, -.025]</b> **  | .008 [-.027, .045]            | -0.019 [-.55, .018]              |
|                                            | Leaf thickness $s_2, \phi$                         | LTh                   |                                 | <b>.077 [.030, .126]</b> **      | -0.017 [-.064, .031]              | .026 [-.016, .066]              | -0.011 [-.058, -.040]         | .004 [-.049, .050]               |
|                                            | <b>Leaf dissection index <math>\phi</math></b>     | <b>LDI</b>            |                                 | -0.009 [-.032, .012]             | -0.017 [-.041, .005]              | .040 [-.002, .077]              | .019 [-.003, .042]            | <b>-.045 [-.069, -.022]</b> **   |
| Thermal tolerance s.l.                     | Frost resistance                                   |                       |                                 |                                  |                                   |                                 |                               |                                  |
|                                            | ...acclimated (1h at -6 °C) $s_1$                  | RES(-)T1              |                                 |                                  |                                   |                                 | -0.081 [-.209, .057]          |                                  |
|                                            | ...non acclimated (1h at -5 °C) $s_2, \phi$        | RES(-)T1              |                                 |                                  |                                   |                                 | .033 [-.042, .106]            |                                  |
|                                            | ...acclimated (1h at -11 °C)                       | RES(-)T2              |                                 |                                  |                                   |                                 | .124 [.021, .234] (.)         |                                  |
|                                            | ...non acclimated, (1h at -10 °C) $s_2$            | RES(-)T2              |                                 |                                  |                                   |                                 | .044 [-.064, .160]            |                                  |
|                                            | Heat resistance                                    |                       |                                 |                                  |                                   |                                 |                               |                                  |
|                                            | ...acclimated (1h at +47 °C) $s_1, \phi$           | RES(+)T1              |                                 |                                  |                                   |                                 | -0.030 [-.174, .121]          |                                  |
|                                            | ...non acclimated (1h at +45 °C) $s_2, \phi$       | RES(+)T1              |                                 |                                  |                                   |                                 | .043 [-.046, .133]            |                                  |
|                                            | ...acclimated (1h at +51 °C) $\phi_N$              | RES(+)T2              |                                 |                                  |                                   |                                 | .029 [-.134, .183]            |                                  |
|                                            | ...non acclimated, (1h at +50 °C) $s_2, \phi$      | <b>RES(+)T2</b>       | <b>Fig. 1E</b>                  |                                  |                                   |                                 | <b>-.177 [-.317, -.038]</b> * |                                  |
|                                            |                                                    |                       | H vs F                          | Elevation                        |                                   | Slope of elevation under H vs F |                               |                                  |
| Tolerance IGR $\phi_N$                     | TOL_IGR                                            |                       | .003 [-.038, .041]              | .013 [-.015, .042]               |                                   | .012 [-.029, .051]              |                               |                                  |
| <b>Tolerance MGR <math>\phi</math></b>     | <b>TOL_MGR</b>                                     | <b>Fig. 1F</b>        | <b>1.494 [1.287, 1.701]</b> *** | .085 [-.128, .293]               |                                   | <b>.312 [.119, .523]</b> *      |                               |                                  |
| <b>Tolerance (-)XMID <math>\phi</math></b> | <b>(-)TOL_XMID</b>                                 | <b>Fig. 1G</b>        | .017 [-.011, .049]              | -0.008 [-.019, .032]             |                                   | <b>.048 [-.018, .077]</b> **    |                               |                                  |
| <b>Tolerance ASYM <math>\phi</math></b>    | <b>TOL_ASYM</b>                                    | <b>Fig. 1H</b>        | <b>.411 [.288, .540]</b> ***    | .013 [-.107, .142]               |                                   | <b>-.304 [-.427, -.176]</b> *** |                               |                                  |

Posterior medians of fixed effects are reported, relative to the baseline of average elevation and mild growth conditions (full details in Supplementary material A3, including results on random effects). For tolerance traits, the coefficients express differences between estimates under heat compared to those under frost. Traits with a significant effect of elevation or its interaction are written in bold (posterior 90% high density interval [HDI] not overlapping with 0, and probability of direction > 97.5% [(.) pd > 95, \* pd > 97.5%, \*\* pd > 99.5%, \*\*\* pd > 99.95]). Traits for which the model accounting for phylogeny was better supported ( $\phi$ ) or not ( $\phi_N$ ) are indicated; when nothing is reported, no statistical difference between models was found. If not specified, a trait was assessed both in S1 and S2.

866  
867  
868  
869

870 **Table 2** List of traits measured in the three growth environments (regular frost, mild and regular  
 871 heat) for which the best supported evolutionary model was Ornstein-Uhlenbeck with two optima  
 872 (OUM), and the suggested trait optima ( $\theta$ ) for low- and high-elevation species  
 873

| Trait ID                                | Treatment              |                |                 |                       |                |                 |                       |                |                 |
|-----------------------------------------|------------------------|----------------|-----------------|-----------------------|----------------|-----------------|-----------------------|----------------|-----------------|
|                                         | Frost                  |                |                 | Mild                  |                |                 | Heat                  |                |                 |
|                                         | Best model             | $\theta_{LOW}$ | $\theta_{HIGH}$ | Best model            | $\theta_{LOW}$ | $\theta_{HIGH}$ | Best model            | $\theta_{LOW}$ | $\theta_{HIGH}$ |
| Seed size                               | .                      | .              | .               | .                     | .              | .               | .                     | .              | .               |
| Time to germination                     | .                      | .              | .               | .                     | .              | .               | .                     | .              | .               |
| Initial growth rate                     | .                      | .              | .               | .                     | .              | .               | .                     | .              | .               |
| <b>Maximal growth rate</b>              | .                      | .              | .               | OUM <sub>4,12</sub>   | .21            | .18             | .                     | .              | .               |
| (-)Time to fastest growth               | .                      | .              | .               | .                     | .              | .               | .                     | .              | .               |
| <b>Asymptotic size</b>                  | OUM <sub>1,88</sub>    | 57.15          | 30.44           | 'OUM' <sub>1,84</sub> | 64.85          | 38.72           | OUM <sub>2,75</sub>   | 70.16          | 23.65           |
| Number of leaves $s_2$                  | .                      | .              | .               | .                     | .              | .               | .                     | .              | .               |
| Leaf area                               | .                      | .              | .               | .                     | .              | .               | .                     | .              | .               |
| <b>Specific leaf area</b>               | .                      | .              | .               | 'OUM' <sub>3,36</sub> | 22.84          | 25.44           | 'OUM' <sub>5,67</sub> | 25.16          | 28.87           |
| <b>Leaf dry matter content</b>          | OUM <sub>18,33</sub>   | 20.64          | 16.83           | .                     | .              | .               | .                     | .              | .               |
| Leaf thickness $s_2$                    | .                      | .              | .               | .                     | .              | .               | .                     | .              | .               |
| Leaf dissection index                   | .                      | .              | .               | .                     | .              | .               | .                     | .              | .               |
| Frost resistance                        | .                      | .              | .               | .                     | .              | .               | .                     | .              | .               |
| ...acclimated (1h at -6 °C) $S_1$       | .                      | .              | .               | .                     | .              | .               | .                     | .              | .               |
| ...non acclimated (1h at -5 °C) $S_2$   | .                      | .              | .               | .                     | .              | .               | .                     | .              | .               |
| ...acclimated (1h at -11 °C)            | .                      | .              | .               | .                     | .              | .               | .                     | .              | .               |
| ...non acclimated, (1h at -10 °C) $S_2$ | .                      | .              | .               | .                     | .              | .               | .                     | .              | .               |
| <b>Heat resistance</b>                  | .                      | .              | .               | .                     | .              | .               | .                     | .              | .               |
| ...acclimated (1h at +47 °C) $S_1$      | .                      | .              | .               | .                     | .              | .               | .                     | .              | .               |
| ...non acclimated (1h at +45 °C) $S_2$  | .                      | .              | .               | .                     | .              | .               | .                     | .              | .               |
| ...acclimated (1h at +51 °C)            | .                      | .              | .               | .                     | .              | .               | OUM <sub>13,89</sub>  | 13.16          | 21.42           |
| ...non acclimated, (1h at +50 °C) $S_2$ | .                      | .              | .               | OUM <sub>0,84</sub>   | 11.68          | 6.62            | .                     | .              | .               |
| Tolerance IGR                           | .                      | .              | .               | .                     | .              | .               | .                     | .              | .               |
| <b>Tolerance MGR</b>                    | .                      | .              | .               | .                     | .              | .               | OUM <sub>57,5</sub>   | 1.52           | 2.44            |
| <b>Tolerance (-)XMID</b>                | 'OUM' <sub>96,22</sub> | .02            | .04             | .                     | .              | .               | OUM <sub>32,88</sub>  | .00            | .11             |
| <b>Tolerance ASYM</b>                   | OUM <sub>126,02</sub>  | -.06           | -.14            | .                     | .              | .               | OUM <sub>76,5</sub>   | .78            | -.30            |

874 The table shows when the best fitting model (lowest mean AICc value) obtained for each trait-treatment combination based on the consensus of 100  
 875 simulations on the full phylogeny was OUM (full details in Supplementary material A4). When OUM was supported with  $\Delta AICc \leq 2$ , it is indicated  
 876 by brackets ('OUM'), when it was not the best supported model, it is indicated by a dot (.). Values in subscript are  $|\Delta AICc|$  between models of adaptive  
 877 vs drift evolution (i.e., OUM vs Brownian motion). If not specified, a trait was assessed both in  $S_1$  and  $S_2$ .

878 **Table 3** Half-life of trait evolution toward the optimum in Mya  
879

| Trait ID                                        | Treatment                                      |                                                |                                               |
|-------------------------------------------------|------------------------------------------------|------------------------------------------------|-----------------------------------------------|
|                                                 | Frost                                          | Mild                                           | Heat                                          |
|                                                 | $t_{1/2} \pm SD$                               | $t_{1/2} \pm SD$                               | $t_{1/2} \pm SD$                              |
| Seed size                                       |                                                | 33.25 ± 28.42                                  |                                               |
| Time to germination                             |                                                | 11.85 ± 11.41                                  |                                               |
| Growth                                          |                                                |                                                |                                               |
| Initial growth rate                             | 5.40 ± 2.77 *                                  | 6.51 ± 2.34 *                                  | 6.66 ± 2.06 *                                 |
| Maximal growth rate                             | .75 ± 2.74                                     | 0.14×10 <sup>4</sup> ± 9.46×10 <sup>4</sup>    | 25.75 ± 667.31                                |
| (-)Time to fastest growth                       | 1.21 ×10 <sup>4</sup> ± 70.84 ×10 <sup>4</sup> | 0.55 ×10 <sup>4</sup> ± 30.15×10 <sup>4</sup>  | 2.89×10 <sup>4</sup> ± 142.19×10 <sup>4</sup> |
| Asymptotic size                                 | 10.90 ± 4.99 *                                 | 15.49 ± 6.88 *                                 | 14.31 ± 9.51                                  |
| Number of leaves <sub>S2</sub>                  | 2.58 ± 2.58                                    | 3.53 ± 3.36                                    | 3.52 ± 2.87                                   |
| Leaf traits                                     |                                                |                                                |                                               |
| Leaf area                                       | 12.09 ± 12.09                                  | 14.23 ± 11.59                                  | 25.49 ± 11.98 *                               |
| Specific leaf area                              | 7.48 ± 2.33 *                                  | 5.27 ± 1.78 *                                  | 5.25 ± 1.94 *                                 |
| Leaf dry matter content                         | 2.62 ± 3.19                                    | 2.86 ± 2.71                                    | 349.66 ± 2.51×10 <sup>4</sup>                 |
| Leaf thickness <sub>S2</sub>                    | 9.55 ± 2.56 *                                  | 7.33 ± 1.57 *                                  | 7.81 ± 1.29 *                                 |
| Leaf dissection index                           | 15.07 ± 6.87 *                                 | 23.36 ± 16.50                                  | 11.44 ± 8.89                                  |
| Thermal tolerance s.l.                          |                                                |                                                |                                               |
| Frost resistance                                |                                                |                                                |                                               |
| ...acclimated (1h at -6 °C) <sub>S1</sub>       | .75 ± 1.49                                     |                                                |                                               |
| ...non acclimated (1h at -5 °C) <sub>S2</sub>   |                                                | 6.24 ± 4.47                                    |                                               |
| ...acclimated (1h at -11 °C)                    | 3.43 ± 2.70                                    |                                                |                                               |
| ...non acclimated, (1h at -10 °C) <sub>S2</sub> |                                                | 1.74 ± 2.38                                    |                                               |
| Heat resistance                                 |                                                |                                                |                                               |
| ...acclimated (1h at +47 °C) <sub>S1</sub>      |                                                |                                                | 2.14 ± 2.54                                   |
| ...non acclimated (1h at +45 °C) <sub>S2</sub>  |                                                | 4.15 ± 3.32                                    |                                               |
| ...acclimated (1h at +51 °C)                    |                                                |                                                | 1.69 ± 1.77                                   |
| ...non acclimated, (1h at +50 °C) <sub>S2</sub> |                                                | 24.86×10 <sup>4</sup> ± 475.96×10 <sup>4</sup> |                                               |
| Tolerance IGR                                   | 5.74 ± 2.47 *                                  |                                                | 5.51 ± 1.75 *                                 |
| Tolerance MGR                                   | .16 ± .26                                      |                                                | .88 ± .70                                     |
| (-)Tolerance XMID                               | .16 ± .39                                      |                                                | 1.46 ± .81 *                                  |
| Tolerance ASYM                                  | .09 ± .15                                      |                                                | .71 ± .49                                     |

880 Values of phylogenetic half-life (from OUI, or OUM if elevation was significant) are based on an ARD model and 100 independent stochastic  
881 character maps (full details in Supplementary material A4). Values are means ± standard deviation (SD) of phylogenetic half-life in Mya for traits  
882 within treatments, calculated based on bootstrap replicates (i.e., the random removal of a third of the species, with N = 10'000 simulations *per* trait  
883 within environment). Significance in half-life (\*) was calculated by mean - 1.64SD > 0. If not specified, a trait was assessed both in S1 and S2.

884 **Table 4** Summary of results on trait differences between low- and high-elevation species in the  
 885 three growth treatments (regular frost [F], mild conditions [M], and regular heat [H]) across types of  
 886 analyses (mixed models [brms], testing for two evolutionary optima [OUM], half-life of trait  
 887 evolution, discriminant analysis of principal components [DAPC], and (negative) correlations [ $\rho$ ])

| Trait ID                                        | Effect of elevation |   |          |     |    |    | Phylogenetic inertia |    |   | Trade-offs |   |   |        |   |   |   |
|-------------------------------------------------|---------------------|---|----------|-----|----|----|----------------------|----|---|------------|---|---|--------|---|---|---|
|                                                 | Brms                |   |          | OUM |    |    | Half-life            |    |   | DAPC       |   |   | $\rho$ |   |   |   |
|                                                 | Elev                | F | M        | H   | F  | M  | H                    | F  | M | H          | F | M | H      | F | M | H |
| Seed size                                       | .                   | . | .        | .   | .  | .  | .                    | .  | . | .          | . | . | .      | . | . | . |
| Time to germination                             | .                   | . | .        | .   | .  | .  | .                    | .  | . | .          | . | . | .      | . | . | . |
| Initial growth rate                             |                     | c |          |     |    |    |                      | ✓  | ✓ | ✓          |   |   |        |   |   |   |
| Maximal growth rate                             |                     | c | +✓       |     |    | ↓✓ |                      |    |   |            |   |   |        |   |   |   |
| (-)Time to fastest growth                       |                     | c | +✓       |     |    |    |                      |    |   |            |   |   |        |   |   |   |
| Asymptotic size                                 |                     | c | -✓       |     | ↓✓ | ↓✓ | ↓✓                   | ✓  | ✓ |            | x | x |        |   |   |   |
| Number of leaves <sub>S2</sub>                  |                     |   | c        |     |    |    |                      |    |   |            |   | x | x      |   |   |   |
| <b>Leaf area</b>                                | -✓                  |   | <b>c</b> | -✓  |    |    |                      |    |   | ✓          | x | ✓ | x      |   |   | ✓ |
| <b>Specific leaf area</b>                       |                     |   | <b>c</b> |     |    | ↑✓ | ↑✓                   | ✓  | ✓ | ✓          | x | ✓ | ✓      |   |   | ✓ |
| <b>Leaf dry matter content</b>                  | -✓                  |   | <b>c</b> |     | ↓✓ |    |                      |    |   |            | ✓ | ✓ |        |   |   | ✓ |
| Leaf thickness <sub>S2</sub>                    |                     |   | c        |     |    |    |                      | ✓  | ✓ | ✓          | ✓ |   |        |   |   | ✓ |
| Leaf dissection index                           |                     |   | c        | -✓  |    |    |                      | ✓  |   |            | ✓ | x | x      |   |   | ✓ |
| Frost resistance                                |                     |   |          |     |    |    |                      |    |   |            |   |   |        |   |   |   |
| ...acclimated (1h at -6 °C) <sub>S1</sub>       |                     |   |          | .   | .  | .  | .                    | .  | . | .          | . | . | .      | . | . | . |
| ...non acclimated (1h at -5 °C) <sub>S2</sub>   |                     |   |          | .   | .  | .  | .                    | .  | . | .          | . | . | .      | . | . | . |
| ...acclimated (1h at -11 °C)                    |                     |   |          | .   | .  | .  | .                    | .  | . | .          | . | . | .      | . | . | . |
| ...non acclimated, (1h at -10 °C) <sub>S2</sub> |                     |   |          | .   | .  | .  | .                    | .  | . | .          | . | . | .      | . | . | . |
| Heat resistance                                 |                     |   |          |     |    |    |                      |    |   |            |   |   |        |   |   |   |
| ...acclimated (1h at +47 °C) <sub>S1</sub>      |                     |   |          | .   | .  | .  | .                    | .  | . | .          | . | . | .      | . | . | . |
| ...non acclimated (1h at +45 °C) <sub>S2</sub>  |                     |   |          | .   | .  | .  | .                    | .  | . | .          | . | . | .      | . | . | . |
| ...acclimated (1h at +51 °C)                    |                     |   |          | .   | .  | .  | .                    | .  | . | .          | . | . | .      | . | . | . |
| ...non acclimated, (1h at +50 °C) <sub>S2</sub> | -✓                  |   | .        | .   | .  | ↓✓ | .                    | .  | . | .          | . | . | .      | . | . | . |
| Tolerance IGR                                   |                     |   | c        | .   | +✓ | .  | .                    | ✓  | . | ✓          | x | . | ✓      | . | . | . |
| Tolerance MGR                                   |                     |   | c        | .   | +✓ | .  | .                    | ✓  | . | ✓          | . | . | ✓      | . | . | . |
| <b>(-)Tolerance XMID</b>                        |                     |   | <b>c</b> | .   | +✓ | ↑✓ | .                    | ↑✓ | . | ↑✓         | . | . | ✓      | . | . | ✓ |
| Tolerance ASYM                                  |                     |   | c        | .   | -✓ | ↓✓ | .                    | ↓✓ | . | ↓✓         | . | ✓ | .      | . | . | . |

888 A significant role of elevation is indicated (✓) when a significant effect (positive or negative) of elevation or an interaction between elevation and  
 889 growth environment (relative to contrast, c environment) was found in the analysis with brms, and when OUM was the best supported evolutionary  
 890 model with the optimum at lower (negative) or higher (positive) trait values for high- compared to low-elevation species. Phylogenetic inertia is  
 891 indicated (✓) when the half-life of trait evolution under OUM (or 'OUM') was > 5 Mya. A trade-off is indicated (✓) when discriminant analysis of  
 892 principal components (DAPC) included the trait in the loads after a threshold was applied, and when selected traits after DAPC were involved in  
 893 significant (negative) correlations ( $\rho$ ). Additional signs indicate: a trait was not assessed in a particular environment (.), or was excluded from analysis  
 894 (x). Lines in bold highlight traits that showed a significant effect of elevation and were involved in negative relationships with others. If not specified,  
 895 a trait was assessed both in S1 and S2.

896

897 **Figure 1** Boxplot showing the distribution of species-mean trait values for which species differed  
898 depending on their median elevation (low- vs high-elevation), either across growth treatments or in  
899 a particular growth treatment (frost, mild, or heat). For simplicity, only data of the second round of  
900 sowing are included and traits for which mixed-effects models and evolutionary models produced  
901 concordant results (panels for both rounds of sowing and all traits are in Supplementary material  
902 A3). Colours inside boxes represent the treatments (blue for frost, greyscale for control and red for  
903 heat), while the intensity represents median elevation of species occurrence (darker colours for low  
904 elevation and lighter colour for high elevation). The thick horizontal line is the median, the lower  
905 and upper hinges are the 25th and 75th percentiles; whiskers extends from the hinges to the smallest  
906 (largest) value at most (no further than)  $1.5 * IQR$  of the hinges, and dots are values beyond that  
907 range.

908

909 **Figure 2** Trait differentiation between low- and high-elevation species, as revealed by discriminant  
910 analyses and multi-trait correlations. Each point represents a species. The median elevation of  
911 origin is represented by a colour scale ranging from green (low elevation) to brown (high elevation).  
912 The black line reflects the relationship between pairs of traits and the associated correlation  
913 coefficient is reported (full details in Supplementary material A5). Traits values are centred and  
914 scaled to unit variance.

915

916



917 Fig. 1

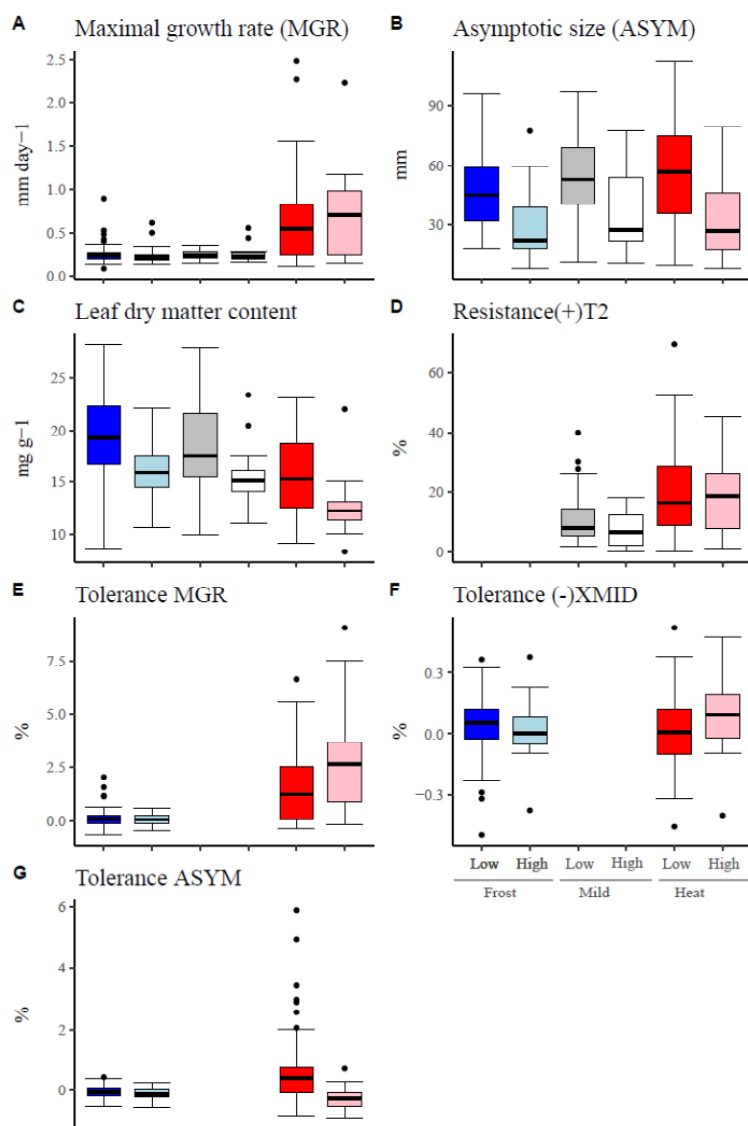

918

919

920 Fig. 2

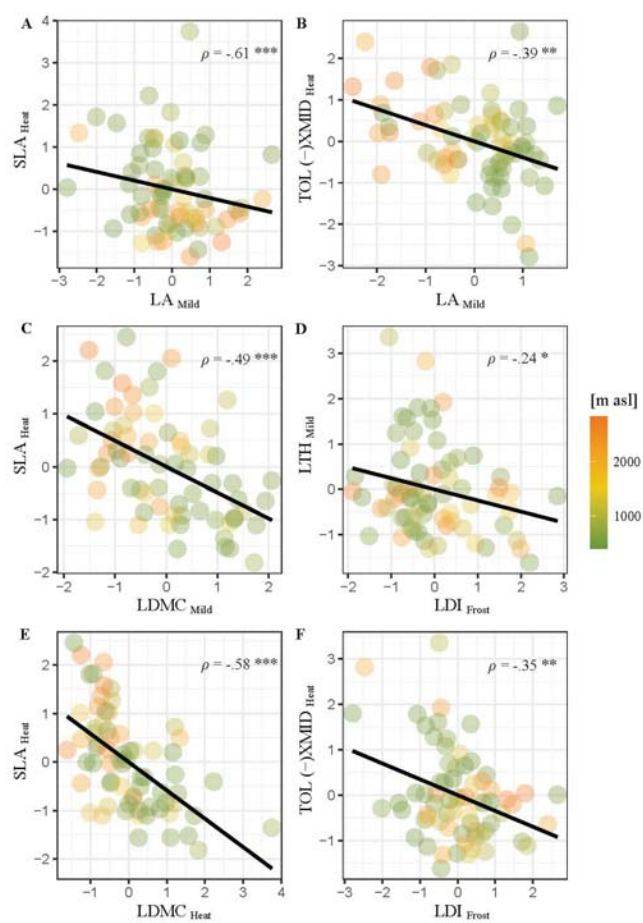

921

922
